# Supplementary material for: Direct Phenological Responses but Later Growth Stimulation upon Spring and Summer/Autumn Warming of Prunus spinosa L. in a Common Garden Environment
Source: MDPI journal article supplement (doi:10.3390/f13010023), 2021-12-24
Supplement: s1 [file s1]

# Direct phenological responses but later growth stimulation upon spring and summer/autumn warming of *Prunus spinosa* L. in a common garden environment

Kristine Vander Mijnsbrugge <sup>1,\*</sup>, Jessa May Malanguis <sup>2</sup>, Stefaan Moreels <sup>1</sup>, Arion Turcsán <sup>3</sup>, Nele Van der Schueren and Eduardo Notivol Paino <sup>4</sup>

<sup>1</sup> Department of Forest Ecology and Management, Research Institute for Nature and Forest, 9500 Geraardsbergen, Belgium; [kristine.vandermijnsbrugge@inbo.be](mailto:kristine.vandermijnsbrugge@inbo.be); [stefaan.moreels@inbo.be](mailto:stefaan.moreels@inbo.be); [vdsnele@hotmail.be](mailto:vdsnele@hotmail.be)

<sup>2</sup> Natural Sciences and Mathematics, University of the Philippines, Visayas Tacloban College, 6500 Tacloban City, Philippines; [malanguisjessamay@gmail.com](mailto:malanguisjessamay@gmail.com)

<sup>3</sup> Bavarian State Institute of Forestry, Department Soil and Climate, Hans-Carl-von-Carlowitz-Platz 1, D-85354 Freising, Germany, [raup25@gmail.com](mailto:raup25@gmail.com)

<sup>4</sup> Department of Forest Resources, Centro de Investigación y Tecnología Agroalimentaria de Aragón (CITA), Avda. Montañana 930, 50059 Zaragoza, Spain; [enotivol@cita-aragon.es](mailto:enotivol@cita-aragon.es)

## SUPPLEMENTARY MATERIAL

### 1. Figures

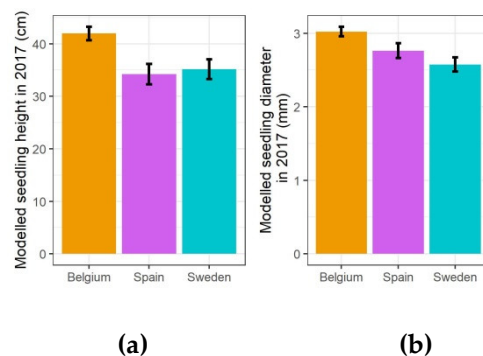

**Figure S1.** Bar plot of the modelled seedling height (a) and stem diameter (b) at the end of 2017, with standard error, for the three provenances in the common garden.

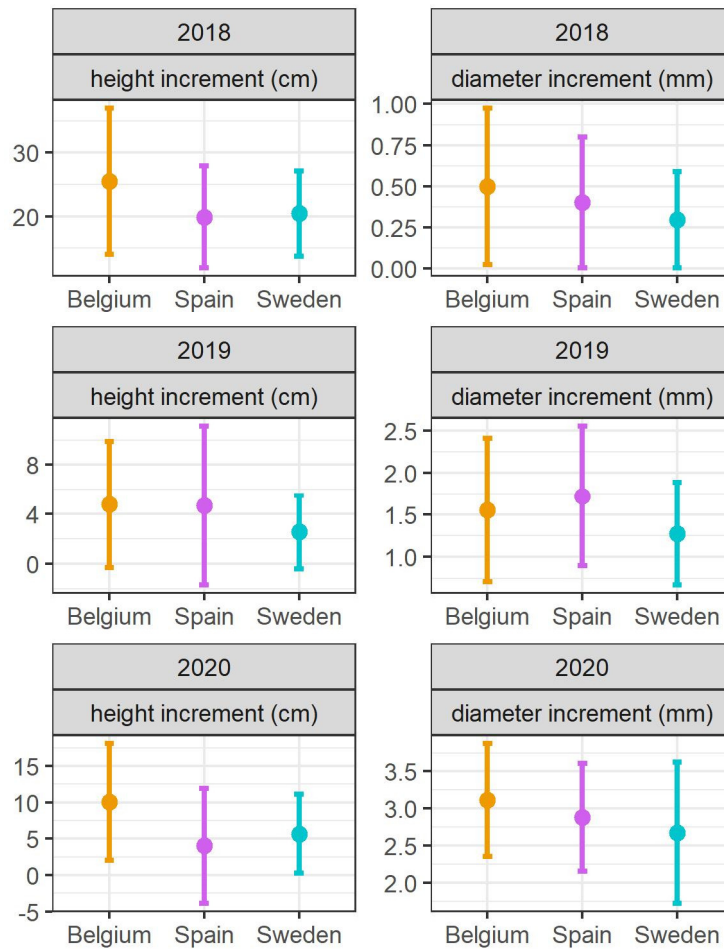

**Figure S2.** Mean and standard deviation of the height increments and diameter increments of the *P. spinosa* L. seedlings in 2018, 2019 and 2020, according to the provenance.

## 2. Tables

**Table S1.** Test statistics for the response variables plant height and stem diameter in 2017. The Belgian provenance is the standard to which the Spanish and Swedish provenances are compared to.

| variable            | height 2017 |           |     |         |           | diameter 2017 |           |     |         |           |
|---------------------|-------------|-----------|-----|---------|-----------|---------------|-----------|-----|---------|-----------|
|                     | estimate    | st. error | df  | t-value | p-value   | estimate      | st. error | df  | t-value | p-value   |
| (Intercept)         | 41.97       | 1.27      | 243 | 32.95   | <0.001*** | 3.02          | 0.07      | 243 | 45.99   | <0.001*** |
| P <sub>Spain</sub>  | -7.76       | 1.96      | 36  | -3.96   | <0.001*** | -0.26         | 0.10      | 36  | -2.57   | 0.015*    |
| P <sub>Sweden</sub> | -6.83       | 1.87      | 36  | -3.66   | 0.001**   | -0.45         | 0.10      | 36  | -4.65   | <0.001*** |

\*\*\*  $p < 0.001$ ; \*\*  $p < 0.01$ ; \*  $p < 0.05$ .

**Table S2.** Test statistics for the response variables height increment and diameter increment in 2018, 2019 and 2020. The Belgian provenance is the standard to which the Spanish and Swedish provenances are compared to. The T<sub>cold-cold</sub> condition of the temperature treatments in 2018 is the standard to which the other three conditions are compared to (T<sub>cold-warm</sub>, T<sub>warm-cold</sub> and T<sub>warm-warm</sub>).

| year | variable               | height increment |           |     |         |           | diameter increment |           |     |         |           |
|------|------------------------|------------------|-----------|-----|---------|-----------|--------------------|-----------|-----|---------|-----------|
|      |                        | estimate         | st. error | df  | t-value | p-value   | estimate           | st. error | df  | t-value | p-value   |
| 2018 | (Intercept)            | 24.54            | 1.65      | 240 | 14.86   | <0.001*** | 0.51               | 0.07      | 240 | 6.87    | <0.001*** |
|      | P <sub>Spain</sub>     | -5.05            | 2.27      | 36  | -2.23   | 0.032*    | -0.12              | 0.10      | 36  | -1.14   | 0.260     |
|      | P <sub>Sweden</sub>    | -4.74            | 2.16      | 36  | -2.19   | 0.035*    | -0.23              | 0.10      | 36  | -2.30   | 0.027*    |
|      | T <sub>cold-warm</sub> | 2.45             | 1.40      | 240 | 1.75    | 0.082     | -0.03              | 0.06      | 240 | -0.43   | 0.670     |

|      |                        |       |      |     |       |           |       |      |     |       |           |
|------|------------------------|-------|------|-----|-------|-----------|-------|------|-----|-------|-----------|
| 2019 | T <sub>warm-cold</sub> | -0.43 | 1.47 | 240 | -0.29 | 0.773     | -0.04 | 0.07 | 240 | -0.57 | 0.571     |
|      | T <sub>warm-warm</sub> | 0.34  | 1.23 | 240 | 0.27  | 0.784     | 0.06  | 0.05 | 240 | 1.03  | 0.306     |
|      | (Intercept)            | 3.94  | 0.81 | 239 | 4.88  | <0.001*** | 1.30  | 0.11 | 240 | 12.31 | <0.001*** |
|      | P <sub>Spain</sub>     | -0.50 | 1.01 | 36  | -0.50 | 0.621     | 0.16  | 0.13 | 36  | 1.23  | 0.226     |
|      | P <sub>Sweden</sub>    | -2.54 | 0.96 | 36  | -2.63 | 0.012*    | -0.27 | 0.12 | 36  | -2.25 | 0.031*    |
|      | T <sub>cold-warm</sub> | 0.51  | 0.87 | 239 | 0.59  | 0.558     | 0.36  | 0.12 | 240 | 2.88  | 0.004**   |
|      | T <sub>warm-cold</sub> | 2.08  | 0.91 | 239 | 2.28  | 0.023*    | 0.12  | 0.13 | 240 | 0.95  | 0.342     |
|      | T <sub>warm-warm</sub> | 2.44  | 0.78 | 239 | 3.12  | 0.002**   | 0.54  | 0.11 | 240 | 4.77  | <0.001*** |
|      | (Intercept)            | 10.48 | 0.83 | 227 | 12.56 | <0.001*** | 3.13  | 0.11 | 240 | 28.21 | <0.001*** |
|      | P <sub>Spain</sub>     | -4.83 | 0.99 | 36  | -4.88 | <0.001*** | -0.23 | 0.13 | 36  | -1.79 | 0.082     |
| 2020 | P <sub>Sweden</sub>    | -4.41 | 0.93 | 36  | -4.77 | <0.001*** | -0.44 | 0.12 | 36  | -3.65 | 0.001**   |
|      | T <sub>cold-warm</sub> | 0.09  | 1.01 | 227 | 0.09  | 0.932     | 0.02  | 0.14 | 240 | 0.18  | 0.856     |
|      | T <sub>warm-cold</sub> | 0.74  | 1.07 | 227 | 0.69  | 0.489     | 0.04  | 0.14 | 240 | 0.25  | 0.806     |
|      | T <sub>warm-warm</sub> | 0.58  | 0.92 | 227 | 0.63  | 0.529     | -0.11 | 0.13 | 240 | -0.85 | 0.395     |

\*\*\* p < 0.001; \*\* p < 0.01; \* p < 0.05.

**Table S3.** Test statistics for the response variable bud burst during the spring temperature treatment in 2018. The Belgian provenance is the standard to which the Spanish and Swedish provenances are compared to. The T<sub>cold</sub> condition of the temperature treatment in the spring of 2018 is the standard to which the other condition T<sub>warm</sub> is compared to. H<sub>1</sub> is the plant height at the end of 2017. D is the day.

|                     | estimate | std. error | z-value | p-value   |
|---------------------|----------|------------|---------|-----------|
| P <sub>Spain</sub>  | 1.20     | 0.54       | 2.21    | 0.027*    |
| P <sub>Sweden</sub> | 5.66     | 0.55       | 10.32   | <0.001*** |
| H <sub>1</sub>      | 0.08     | 0.02       | 3.93    | <0.001*** |
| D                   | -0.49    | 0.02       | -28.02  | <0.001*** |
| T <sub>warm</sub>   | -2.69    | 0.40       | -6.78   | <0.001*** |
| D:T <sub>warm</sub> | -0.28    | 0.02       | -17.51  | <0.001*** |

\*\*\* p < 0.001; \*\* p < 0.01; \* p < 0.05.

**Table S4.** Test statistics for the response variable leaf senescence during the summer/autumn temperature treatment in 2018. The Belgian provenance is the standard to which the Spanish and Swedish provenances are compared to. The T<sub>cold-cold</sub> condition of the temperature treatments in 2018 (cold/warm in spring 2018 – cold/warm in autumn 2018) is the standard to which the other three conditions are compared to (T<sub>cold-warm</sub>, T<sub>warm-cold</sub> and T<sub>warm-warm</sub>). H<sub>2</sub> is the plant height at the end of 2018. D is day.

|                          | estimate | std. error | z-value | p-value   |
|--------------------------|----------|------------|---------|-----------|
| P <sub>Spain</sub>       | -1.17    | 0.86       | -1.36   | 0.174     |
| P <sub>Sweden</sub>      | 4.77     | 1.01       | 4.72    | <0.001*** |
| H <sub>2</sub>           | 0.24     | 0.04       | 5.37    | <0.001*** |
| T <sub>cold-warm</sub>   | -2.37    | 0.88       | -2.68   | 0.007**   |
| T <sub>warm-cold</sub>   | -3.17    | 1.00       | -3.18   | 0.001**   |
| T <sub>warm-warm</sub>   | -2.72    | 0.84       | -3.23   | 0.001**   |
| D                        | 0.24     | 0.04       | 6.39    | <0.001*** |
| D:T <sub>cold-warm</sub> | -0.10    | 0.04       | -2.82   | 0.005**   |
| D:T <sub>warm-cold</sub> | 0.10     | 0.04       | 2.54    | 0.011*    |
| D:T <sub>warm-warm</sub> | -0.09    | 0.03       | -2.65   | 0.008**   |

\*\*\* p < 0.001; \*\* p < 0.01; \* p < 0.05.

**Table S5.** Test statistics for the response variable relative chlorophyll content on the 23<sup>rd</sup> of August 2018. The Belgian provenance is the standard to which the Spanish and Swedish provenances are compared to. The T<sub>cold-cold</sub> condition of the temperature treatments in 2018 (cold/warm in spring 2018 – cold/warm in autumn 2018) is the standard to which the other three conditions are compared to (T<sub>cold-warm</sub>, T<sub>warm-cold</sub> and T<sub>warm-warm</sub>). H<sub>2</sub> is the plant height at the end of 2018.

|                        | estimate | st. error | df  | t-value | p-value   |
|------------------------|----------|-----------|-----|---------|-----------|
| (Intercept)            | 10.81    | 0.82      | 219 | 13.11   | <0.001*** |
| P <sub>Spain</sub>     | 2.55     | 0.50      | 36  | 5.12    | <0.001*** |
| P <sub>Sweden</sub>    | -0.85    | 0.48      | 36  | -1.78   | 0.084     |
| T <sub>cold-warm</sub> | 1.91     | 0.42      | 219 | 4.53    | <0.001*** |
| T <sub>warm-cold</sub> | 2.82     | 0.45      | 219 | 6.25    | <0.001*** |
| T <sub>warm-warm</sub> | 3.55     | 0.40      | 219 | 8.96    | <0.001*** |
| H <sub>2</sub>         | -0.08    | 0.02      | 219 | -4.21   | <0.001*** |

\*\*\* p < 0.001; \*\* p < 0.01; \* p < 0.05.

**Table S6.** Test statistics for the response variables bud burst and leaf senescence in 2019. The Belgian provenance is the standard to which the Spanish and Swedish provenances are compared to. The T<sub>cold-cold</sub> condition of the temperature treatments in 2018 (cold/warm in spring 2018 – cold/warm in autumn 2018) is the standard to which the other three conditions are compared to (T<sub>cold-warm</sub>, T<sub>warm-cold</sub> and T<sub>warm-warm</sub>). H is the plant height at the end of 2018 in the model of the response variable bud burst in 2019 and it is the plant height at the end of 2019 in the model of the response variable leaf senescence in 2019. D is day.

| bud burst 2019         |          |            |         |           | leaf senescence 2019 |            |         |           |
|------------------------|----------|------------|---------|-----------|----------------------|------------|---------|-----------|
|                        | estimate | std. error | z-value | p-value   | estimate             | std. error | z-value | p-value   |
| P <sub>Spain</sub>     | -0.54    | 0.47       | -1.15   | 0.249     | 0.33                 | 0.24       | 1.38    | 0.168     |
| P <sub>Sweden</sub>    | 4.87     | 0.48       | 10.06   | <0.001*** | 1.29                 | 0.24       | 5.34    | <0.001*** |
| H                      | 0.16     | 0.02       | 9.81    | <0.001*** | 0.03                 | 0.01       | 2.94    | 0.003**   |
| T <sub>cold-warm</sub> | 0.98     | 0.37       | 2.66    | 0.008**   | -0.17                | 0.26       | -0.66   | 0.512     |
| T <sub>warm-cold</sub> | -0.28    | 0.38       | -0.72   | 0.470     | -0.10                | 0.27       | -0.37   | 0.713     |
| T <sub>warm-warm</sub> | 0.56     | 0.32       | 1.72    | 0.086     | -0.01                | 0.24       | -0.02   | 0.981     |
| D                      | -0.37    | 0.02       | -22.24  | <0.001*** | 0.12                 | 0.01       | 19.75   | <0.001*** |

\*\*\* p < 0.001; \*\* p < 0.01; \* p < 0.05.

**Table S7.** Test statistics for the response variables bud burst and leaf senescence in 2020. The Belgian provenance is the standard to which the Spanish and Swedish provenances are compared to. The T<sub>cold-cold</sub> condition of the temperature treatments in 2018 (cold/warm in spring 2018 – cold/warm in autumn 2018) is the standard to which the other three conditions are compared to (T<sub>cold-warm</sub>, T<sub>warm-cold</sub> and T<sub>warm-warm</sub>). H is the plant height at the end of 2019 in the model of the response variable bud burst in 2020 and it is the plant height at the end of 2020 in the model of the response variable leaf senescence in 2020.

| bud burst 2020         |          |            |         |           | leaf senescence 2020 |            |         |           |
|------------------------|----------|------------|---------|-----------|----------------------|------------|---------|-----------|
|                        | estimate | std. error | z-value | p-value   | estimate             | std. error | z-value | p-value   |
| P <sub>Spain</sub>     | 0.90     | 0.29       | 3.13    | 0.002**   | 0.73                 | 0.51       | 1.43    | 0.152     |
| P <sub>Sweden</sub>    | 3.86     | 0.32       | 11.97   | <0.001*** | 0.87                 | 0.49       | 1.78    | 0.075     |
| H                      | 0.05     | 0.01       | 4.44    | <0.001*** | 0.05                 | 0.02       | 3.22    | 0.001**   |
| T <sub>cold-warm</sub> | 0.20     | 0.32       | 0.63    | 0.531     | -1.19                | 0.47       | -2.50   | 0.013*    |
| T <sub>warm-cold</sub> | 0.03     | 0.33       | 0.08    | 0.935     | -0.72                | 0.49       | -1.46   | 0.146     |
| T <sub>warm-warm</sub> | 0.19     | 0.30       | 0.63    | 0.526     | -0.75                | 0.43       | -1.74   | 0.082     |
| D                      | -0.39    | 0.02       | -20.83  | <0.001*** | 0.15                 | 0.01       | 16.61   | <0.001*** |

\*\*\* p < 0.001; \*\* p < 0.01; \* p < 0.05.

**Table S8.** Data. plantID: unique plant identity code, region: region of origin with S: Spain, V: Belgium and Z: Sweden, mpl: unique identity code for every mother plant from which seed was collected, treat1: treatment in the spring of 2018, treat2: combination of treatment in the spring of 2018 and summer/autumn 2018, headings of phenological scores consist of the phenophase abbreviation with bb: bud burst and se: leaf senescence, followed by the actual date of observation, h17 until h20: heights of the plants in 2017 until 2020, d17 until d20: diameters of the plants in 2017 until 2020, hinc18 till hinc20: height increments in 2018 until 2020, dinc18 until dinc20: diameter increments in 2018 until 2020, cc23aug18: relative chlorophyll content on this date.

| plantID | region | mpl      | treat1 | treat2   | bb26feb18 | bb1mar18 | bb5mar18 | bb8mar18 | bb12mar18 | bb15mar18 | bb19mar18 | bb26mar18 |
|---------|--------|----------|--------|----------|-----------|----------|----------|----------|-----------|-----------|-----------|-----------|
| p895    | S      | S1       | cold   | coldcold | 1         | 1        | 2        | 2        | 2         | 3         | 3         | 4         |
| p985    | S      | S10      | cold   | coldcold | 1         | 1        | 1        | 2        | 2         | 3         | 3         | 4         |
| p801    | S      | S11 P.S. | cold   | coldcold | 1         | 1        | 1        | 2        | 2         | 3         | 3         | 4         |
| p802    | S      | S11 P.S. | cold   | coldcold | 1         | 1        | 1        | 2        | 2         | 2         | 3         | 3         |
| p806    | S      | S11 P.S. | cold   | coldcold | 1         | 1        | 1        | 1        | 2         | 2         | 3         | 3         |
| p811    | S      | S11 P.S. | cold   | coldcold | 1         | 1        | 1        | 2        | 2         | 2         | 2         | 3         |
| p1099   | S      | S12 P.S. | cold   | coldcold | 1         | 1        | 2        | 2        | 3         | 3         | 3         | 4         |
| p818    | S      | S13 P.S. | cold   | coldcold | 1         | 1        | 1        | 1        | 1         | 2         | 2         | 3         |
| p823    | S      | S13 P.S. | cold   | coldcold | 1         | 1        | 1        | 2        | 2         | 3         | 3         | 4         |
| p827    | S      | S13 P.S. | cold   | coldcold | 1         | 1        | 1        | 1        | 2         | 3         | 3         | 4         |
| p831    | S      | S13 P.S. | cold   | coldcold | 1         | 1        | 1        | 1        | 2         | 3         | 3         | 3         |
| p202    | S      | S15      | cold   | coldcold | 1         | 1        | 1        | 1        | 2         | 2         | 3         | 3         |
| p937    | S      | S18      | cold   | coldcold | 1         | 1        | 1        | 1        | 1         | 2         | 2         | 2         |
| p938    | S      | S18      | cold   | coldcold | 1         | 1        | 1        | 1        | 1         | 1         | 1         | 1         |
| p940    | S      | S18      | cold   | coldcold | 1         | 1        | 1        | 1        | 1         | 2         | 2         | 3         |
| p970    | S      | S3       | cold   | coldcold | 1         | 1        | 1        | 2        | 3         | 3         | 3         | 4         |
| p974    | S      | S3       | cold   | coldcold | 1         | 1        | 1        | 1        | 2         | 2         | 3         | 3         |
| p26     | S      | S7       | cold   | coldcold | 1         | 1        | 1        | 2        | 2         | 3         | 3         | 4         |
| p34     | S      | S7       | cold   | coldcold | 1         | 1        | 2        | 2        | 2         | 2         | 2         | 3         |
| p39     | S      | S7       | cold   | coldcold | 1         | 1        | 1        | 1        | 1         | 1         | 1         | 1         |
| p1106   | S      | S8 P.S.  | cold   | coldcold | 1         | 1        | 1        | 1        | 2         | 3         | 3         | 3         |
| p1126   | S      | S8 P.S.  | cold   | coldcold | 1         | 1        | 2        | 2        | 2         | 3         | 3         | 3         |
| p726    | S      | S9       | cold   | coldcold | 1         | 1        | 1        | 1        | 2         | 3         | 3         | 3         |
| p731    | S      | S9       | cold   | coldcold | 1         | 1        | 1        | 2        | 2         | 3         | 3         | 3         |
| p711    | V      | BR 32    | cold   | coldcold | 1         | 1        | 1        | 1        | 1         | 2         | 2         | 3         |
| p487    | V      | EN32     | cold   | coldcold | 1         | 1        | 1        | 2        | 2         | 3         | 3         | 4         |

|      |   |          |      |          |   |   |   |   |   |   |   |   |
|------|---|----------|------|----------|---|---|---|---|---|---|---|---|
| p322 | V | OO1      | cold | coldcold | 1 | 1 | 1 | 2 | 1 | 2 | 3 | 4 |
| p330 | V | OO1      | cold | coldcold | 1 | 1 | 1 | 2 | 2 | 3 | 3 | 4 |
| p221 | V | SH1      | cold | coldcold | 1 | 1 | 1 | 1 | 2 | 3 | 3 | 4 |
| p226 | V | SH1      | cold | coldcold | 1 | 1 | 1 | 2 | 2 | 3 | 3 | 4 |
| p235 | V | SH1      | cold | coldcold | 1 | 1 | 1 | 2 | 2 | 3 | 3 | 4 |
| p506 | V | V1       | cold | coldcold | 1 | 1 | 1 | 1 | 1 | 1 | 2 | 3 |
| p508 | V | V1       | cold | coldcold | 1 | 1 | 1 | 1 | 2 | 2 | 3 | 3 |
| p554 | V | V10 P.S. | cold | coldcold | 1 | 1 | 1 | 1 | 2 | 2 | 3 | 3 |
| p555 | V | V10 P.S. | cold | coldcold | 1 | 1 | 1 | 2 | 2 | 3 | 3 | 3 |
| p170 | V | V2       | cold | coldcold | 1 | 1 | 2 | 2 | 3 | 3 | 3 | 4 |
| p174 | V | V2       | cold | coldcold | 1 | 1 | 1 | 2 | 2 | 3 | 3 | 4 |
| p178 | V | V2       | cold | coldcold | 1 | 1 | 2 | 2 | 3 | 3 | 4 | 4 |
| p182 | V | V2       | cold | coldcold | 1 | 1 | 1 | 1 | 1 | 3 | 1 | 4 |
| p115 | V | V3       | cold | coldcold | 1 | 1 | 1 | 2 | 2 | 3 | 3 | 3 |
| p122 | V | V4       | cold | coldcold | 1 | 1 | 1 | 2 | 2 | 3 | 3 | 4 |
| p126 | V | V4       | cold | coldcold | 1 | 1 | 1 | 2 | 2 | 3 | 3 | 4 |
| p134 | V | V4       | cold | coldcold | 1 | 1 | 2 | 2 | 2 | 3 | 3 | 4 |
| p135 | V | V4       | cold | coldcold | 2 | 2 | 2 | 2 | 3 | 3 | 4 | 4 |
| p848 | V | V5       | cold | coldcold | 1 | 1 | 1 | 2 | 2 | 3 | 3 | 4 |
| p858 | V | V5       | cold | coldcold | 1 | 1 | 1 | 1 | 1 | 1 | 2 | 3 |
| p758 | V | V6       | cold | coldcold | 1 | 1 | 1 | 2 | 2 | 3 | 3 | 4 |
| p764 | V | V6       | cold | coldcold | 1 | 1 | 1 | 1 | 2 | 2 | 2 | 3 |
| p767 | V | V6       | cold | coldcold | 1 | 1 | 1 | 1 | 1 | 1 | 2 | 2 |
| p434 | V | V7       | cold | coldcold | 1 | 1 | 1 | 1 | 1 | 2 | 3 | 3 |
| p436 | V | V7       | cold | coldcold | 1 | 1 | 1 | 2 | 2 | 3 | 3 | 4 |
| p870 | V | V8 P.S.  | cold | coldcold | 1 | 1 | 1 | 1 | 1 | 2 | 3 | 3 |
| p879 | V | V8 P.S.  | cold | coldcold | 1 | 1 | 1 | 1 | 2 | 2 | 2 | 3 |
| p339 | V | V9       | cold | coldcold | 1 | 1 | 1 | 2 | 2 | 3 | 3 | 4 |
| p354 | V | V9       | cold | coldcold | 1 | 1 | 1 | 1 | 2 | 3 | 3 | 3 |
| p158 | V | ZW30     | cold | coldcold | 1 | 1 | 1 | 2 | 2 | 3 | 3 | 4 |
| p163 | V | ZW30     | cold | coldcold | 1 | 1 | 1 | 1 | 2 | 3 | 3 | 4 |

|       |   |          |      |          |   |   |   |   |   |   |   |   |
|-------|---|----------|------|----------|---|---|---|---|---|---|---|---|
| p1039 | Z | Z1       | cold | coldcold | 1 | 1 | 1 | 1 | 1 | 1 | 1 | 1 |
| p1043 | Z | Z1       | cold | coldcold | 1 | 1 | 1 | 1 | 1 | 1 | 1 | 2 |
| p1047 | Z | Z1       | cold | coldcold | 1 | 1 | 1 | 1 | 1 | 1 | 2 | 3 |
| p1051 | Z | Z1       | cold | coldcold | 1 | 1 | 1 | 1 | 1 | 2 | 2 | 3 |
| p467  | Z | Z10      | cold | coldcold | 1 | 1 | 1 | 1 | 1 | 2 | 2 | 3 |
| p471  | Z | Z10      | cold | coldcold | 1 | 1 | 1 | 1 | 1 | 1 | 1 | 2 |
| p475  | Z | Z10      | cold | coldcold | 1 | 1 | 1 | 1 | 1 | 1 | 1 | 1 |
| p603  | Z | Z11 P.S. | cold | coldcold | 1 | 1 | 1 | 1 | 1 | 1 | 1 | 2 |
| p607  | Z | Z11 P.S. | cold | coldcold | 1 | 1 | 1 | 1 | 1 | 1 | 1 | 2 |
| p614  | Z | Z11 P.S. | cold | coldcold | 1 | 1 | 1 | 1 | 1 | 1 | 1 | 2 |
| p618  | Z | Z11 P.S. | cold | coldcold | 1 | 1 | 1 | 1 | 1 | 1 | 1 | 1 |
| p778  | Z | Z12 P.S. | cold | coldcold | 1 | 1 | 1 | 1 | 1 | 1 | 1 | 2 |
| p786  | Z | Z12 P.S. | cold | coldcold | 1 | 1 | 1 | 1 | 2 | 2 | 3 | 3 |
| p1014 | Z | Z14 P.S. | cold | coldcold | 1 | 1 | 1 | 1 | 1 | 1 | 1 | 2 |
| p1023 | Z | Z14 P.S. | cold | coldcold | 1 | 1 | 1 | 1 | 1 | 2 | 2 | 3 |
| p1026 | Z | Z14 P.S. | cold | coldcold | 1 | 1 | 1 | 1 | 1 | 1 | 1 | 1 |
| p50   | Z | Z15      | cold | coldcold | 1 | 1 | 1 | 1 | 1 | 1 | 2 | 1 |
| p51   | Z | Z15      | cold | coldcold | 1 | 1 | 1 | 1 | 1 | 1 | 2 | 3 |
| p55   | Z | Z15      | cold | coldcold | 1 | 1 | 1 | 1 | 1 | 1 | 1 | 1 |
| p918  | Z | Z2       | cold | coldcold | 1 | 1 | 1 | 1 | 1 | 1 | 1 | 1 |
| p654  | Z | Z3 P.S.  | cold | coldcold | 1 | 1 | 1 | 1 | 1 | 1 | 1 | 4 |
| p87   | Z | Z4       | cold | coldcold | 1 | 1 | 1 | 1 | 1 | 1 | 1 | 1 |
| p379  | Z | Z5       | cold | coldcold | 1 | 1 | 1 | 1 | 1 | 1 | 1 | 2 |
| p678  | Z | Z6 P.S.  | cold | coldcold | 1 | 1 | 1 | 1 | 1 | 1 | 1 | 2 |
| p682  | Z | Z6 P.S.  | cold | coldcold | 1 | 1 | 1 | 1 | 1 | 1 | 1 | 1 |
| p690  | Z | Z6 P.S.  | cold | coldcold | 1 | 1 | 1 | 1 | 1 | 1 | 1 | 1 |
| p251  | Z | Z7       | cold | coldcold | 1 | 1 | 1 | 1 | 1 | 1 | 1 | 1 |
| p258  | Z | Z7       | cold | coldcold | 1 | 1 | 1 | 1 | 1 | 2 | 2 | 3 |
| p271  | Z | Z9       | cold | coldcold | 1 | 1 | 1 | 1 | 1 | 1 | 1 | 2 |
| p279  | Z | Z9       | cold | coldcold | 1 | 1 | 1 | 1 | 1 | 1 | 1 | 2 |
| p898  | S | S1       | cold | coldwarm | 1 | 1 | 1 | 1 | 2 | 3 | 3 | 3 |

|       |   |          |      |          |   |   |   |   |   |   |   |   |
|-------|---|----------|------|----------|---|---|---|---|---|---|---|---|
| p899  | S | S1       | cold | coldwarm | 1 | 1 | 1 | 1 | 1 | 2 | 2 | 3 |
| p907  | S | S1       | cold | coldwarm | 1 | 1 | 1 | 1 | 2 | 3 | 3 | 4 |
| p1005 | S | S10      | cold | coldwarm | 1 | 1 | 1 | 1 | 1 | 2 | 2 | 3 |
| p990  | S | S10      | cold | coldwarm | 1 | 1 | 1 | 1 | 1 | 2 | 2 | 3 |
| p998  | S | S10      | cold | coldwarm | 1 | 1 | 2 | 2 | 2 | 3 | 2 | 3 |
| p1083 | S | S12 P.S. | cold | coldwarm | 1 | 1 | 1 | 1 | 1 | 2 | 2 | 3 |
| p1094 | S | S12 P.S. | cold | coldwarm | 1 | 1 | 1 | 1 | 2 | 2 | 3 | 3 |
| p195  | S | S15      | cold | coldwarm | 1 | 1 | 1 | 2 | 2 | 3 | 3 | 4 |
| p207  | S | S15      | cold | coldwarm | 1 | 1 | 1 | 1 | 2 | 2 | 3 | 3 |
| p212  | S | S15      | cold | coldwarm | 1 | 1 | 1 | 2 | 2 | 3 | 3 | 4 |
| p946  | S | S18      | cold | coldwarm | 1 | 1 | 1 | 1 | 1 | 1 | 1 | 1 |
| p966  | S | S3       | cold | coldwarm | 1 | 1 | 1 | 2 | 2 | 3 | 3 | 4 |
| p40   | S | S7       | cold | coldwarm | 1 | 1 | 1 | 1 | 2 | 3 | 3 | 4 |
| p1111 | S | S8 P.S.  | cold | coldwarm | 1 | 1 | 2 | 2 | 2 | 3 | 3 | 4 |
| p1122 | S | S8 P.S.  | cold | coldwarm | 1 | 1 | 1 | 2 | 2 | 3 | 3 | 4 |
| p738  | S | S9       | cold | coldwarm | 1 | 1 | 1 | 1 | 1 | 1 | 1 | 2 |
| p739  | S | S9       | cold | coldwarm | 1 | 1 | 1 | 1 | 2 | 2 | 2 | 3 |
| p703  | V | BR 32    | cold | coldwarm | 1 | 1 | 1 | 1 | 2 | 2 | 2 | 3 |
| p706  | V | BR 32    | cold | coldwarm | 1 | 1 | 1 | 1 | 1 | 2 | 2 | 3 |
| p714  | V | BR 32    | cold | coldwarm | 1 | 1 | 1 | 1 | 2 | 3 | 3 | 3 |
| p482  | V | EN32     | cold | coldwarm | 1 | 1 | 2 | 1 | 2 | 2 | 3 | 3 |
| p490  | V | EN32     | cold | coldwarm | 1 | 1 | 1 | 2 | 2 | 3 | 3 | 4 |
| p502  | V | EN32     | cold | coldwarm | 1 | 1 | 1 | 1 | 1 | 2 | 2 | 3 |
| p234  | V | SH1      | cold | coldwarm | 1 | 1 | 1 | 2 | 2 | 3 | 3 | 4 |
| p520  | V | V1       | cold | coldwarm | 1 | 1 | 1 | 2 | 3 | 3 | 3 | 4 |
| p566  | V | V10 P.S. | cold | coldwarm | 1 | 1 | 1 | 1 | 1 | 1 | 1 | 3 |
| p567  | V | V10 P.S. | cold | coldwarm | 1 | 1 | 1 | 2 | 2 | 3 | 3 | 4 |
| p102  | V | V3       | cold | coldwarm | 1 | 1 | 1 | 1 | 2 | 3 | 3 | 4 |
| p107  | V | V3       | cold | coldwarm | 1 | 1 | 1 | 2 | 2 | 3 | 3 | 4 |
| p114  | V | V3       | cold | coldwarm | 1 | 1 | 1 | 1 | 2 | 3 | 3 | 4 |
| p850  | V | V5       | cold | coldwarm | 1 | 1 | 1 | 2 | 2 | 3 | 3 | 4 |



|       |   |          |      |          |   |   |   |   |   |   |   |   |
|-------|---|----------|------|----------|---|---|---|---|---|---|---|---|
| p854  | V | V5       | cold | coldwarm | 1 | 1 | 1 | 2 | 2 | 3 | 3 | 4 |
| p750  | V | V6       | cold | coldwarm | 1 | 1 | 1 | 1 | 1 | 1 | 2 | 2 |
| p437  | V | V7       | cold | coldwarm | 1 | 1 | 1 | 1 | 2 | 3 | 3 | 4 |
| p439  | V | V7       | cold | coldwarm | 1 | 1 | 1 | 1 | 2 | 3 | 3 | 3 |
| p883  | V | V8 P.S.  | cold | coldwarm | 1 | 1 | 1 | 1 | 2 | 2 | 2 | 3 |
| p886  | V | V8 P.S.  | cold | coldwarm | 1 | 1 | 1 | 1 | 1 | 1 | 1 | 1 |
| p346  | V | V9       | cold | coldwarm | 1 | 2 | 2 | 2 | 3 | 3 | 3 | 4 |
| p150  | V | ZW30     | cold | coldwarm | 1 | 1 | 1 | 1 | 1 | 2 | 2 | 3 |
| p159  | V | ZW30     | cold | coldwarm | 1 | 1 | 1 | 2 | 2 | 3 | 3 | 4 |
| p463  | Z | Z10      | cold | coldwarm | 1 | 1 | 1 | 1 | 1 | 1 | 1 | 2 |
| p782  | Z | Z12 P.S. | cold | coldwarm | 1 | 1 | 1 | 1 | 1 | 2 | 2 | 3 |
| p787  | Z | Z12 P.S. | cold | coldwarm | 1 | 1 | 1 | 1 | 1 | 2 | 2 | 3 |
| p1015 | Z | Z14 P.S. | cold | coldwarm | 1 | 1 | 1 | 1 | 1 | 1 | 1 | 1 |
| p66   | Z | Z15      | cold | coldwarm | 1 | 1 | 1 | 1 | 1 | 1 | 1 | 1 |
| p922  | Z | Z2       | cold | coldwarm | 1 | 1 | 1 | 1 | 1 | 1 | 1 | 2 |
| p926  | Z | Z2       | cold | coldwarm | 1 | 1 | 1 | 1 | 1 | 2 | 2 | 3 |
| p930  | Z | Z2       | cold | coldwarm | 1 | 1 | 1 | 1 | 1 | 2 | 2 | 3 |
| p658  | Z | Z3 P.S.  | cold | coldwarm | 1 | 1 | 1 | 1 | 1 | 2 | 2 | 3 |
| p662  | Z | Z3 P.S.  | cold | coldwarm | 1 | 1 | 1 | 1 | 1 | 1 | 1 | 1 |
| p666  | Z | Z3 P.S.  | cold | coldwarm | 1 | 1 | 1 | 2 | 2 | 3 | 3 | 4 |
| p91   | Z | Z4       | cold | coldwarm | 1 | 1 | 1 | 1 | 1 | 1 | 1 | 1 |
| p95   | Z | Z4       | cold | coldwarm | 1 | 1 | 1 | 1 | 1 | 1 | 1 | 1 |
| p367  | Z | Z5       | cold | coldwarm | 1 | 1 | 1 | 1 | 2 | 2 | 2 | 3 |
| p370  | Z | Z5       | cold | coldwarm | 1 | 1 | 1 | 1 | 1 | 2 | 2 | 3 |
| p374  | Z | Z5       | cold | coldwarm | 1 | 1 | 1 | 1 | 1 | 2 | 2 | 3 |
| p675  | Z | Z6 P.S.  | cold | coldwarm | 1 | 1 | 1 | 1 | 1 | 1 | 1 | 1 |
| p242  | Z | Z7       | cold | coldwarm | 1 | 1 | 1 | 1 | 1 | 2 | 2 | 2 |
| p262  | Z | Z7       | cold | coldwarm | 1 | 1 | 1 | 1 | 2 | 3 | 3 | 3 |
| p270  | Z | Z9       | cold | coldwarm | 1 | 1 | 1 | 1 | 1 | 1 | 1 | 1 |
| p278  | Z | Z9       | cold | coldwarm | 1 | 1 | 1 | 1 | 1 | 1 | 1 | 3 |
| p894  | S | S1       | warm | warmcold | 1 | 1 | 2 | 3 | 3 | 3 | 4 | 4 |

|       |   |          |      |          |   |   |   |   |   |   |   |   |
|-------|---|----------|------|----------|---|---|---|---|---|---|---|---|
| p902  | S | S1       | warm | warmcold | 1 | 1 | 1 | 2 | 2 | 3 | 3 | 4 |
| p903  | S | S1       | warm | warmcold | 1 | 1 | 2 | 3 | 4 | 4 | 4 | 4 |
| p1006 | S | S10      | warm | warmcold | 1 | 1 | 3 | 3 | 4 | 4 | 5 | 4 |
| p994  | S | S10      | warm | warmcold | 1 | 1 | 2 | 3 | 4 | 4 | 4 | 4 |
| p1082 | S | S12 P.S. | warm | warmcold | 1 | 1 | 2 | 3 | 4 | 4 | 4 | 4 |
| p1090 | S | S12 P.S. | warm | warmcold | 1 | 1 | 2 | 3 | 4 | 4 | 4 | 4 |
| p203  | S | S15      | warm | warmcold | 1 | 1 | 2 | 3 | 4 | 4 | 4 | 4 |
| p208  | S | S15      | warm | warmcold | 1 | 1 | 2 | 3 | 4 | 4 | 4 | 4 |
| p211  | S | S15      | warm | warmcold | 1 | 1 | 2 | 3 | 4 | 4 | 4 | 4 |
| p1119 | S | S8 P.S.  | warm | warmcold | 1 | 1 | 3 | 3 | 4 | 4 | 4 | 4 |
| p1123 | S | S8 P.S.  | warm | warmcold | 1 | 1 | 2 | 3 | 3 | 4 | 4 | 4 |
| p730  | S | S9       | warm | warmcold | 1 | 1 | 2 | 3 | 3 | 3 | 4 | 4 |
| p735  | S | S9       | warm | warmcold | 1 | 1 | 2 | 3 | 3 | 4 | 4 | 4 |
| p702  | V | BR 32    | warm | warmcold | 1 | 1 | 1 | 2 | 3 | 4 | 4 | 4 |
| p710  | V | BR 32    | warm | warmcold | 1 | 1 | 2 | 3 | 4 | 4 | 4 | 4 |
| p715  | V | BR 32    | warm | warmcold | 1 | 1 | 1 | 2 | 3 | 4 | 4 | 4 |
| p486  | V | EN32     | warm | warmcold | 1 | 1 | 2 | 3 | 4 | 4 | 4 | 4 |
| p494  | V | EN32     | warm | warmcold | 1 | 2 | 3 | 3 | 4 | 4 | 4 | 4 |
| p503  | V | EN32     | warm | warmcold | 1 | 1 | 2 | 3 | 4 | 4 | 4 | 4 |
| p331  | V | OO1      | warm | warmcold | 1 | 1 | 2 | 3 | 4 | 4 | 4 | 4 |
| p223  | V | SH1      | warm | warmcold | 1 | 1 | 3 | 3 | 4 | 4 | 4 | 4 |
| p522  | V | V1       | warm | warmcold | 1 | 1 | 3 | 3 | 4 | 4 | 5 | 5 |
| p570  | V | V10 P.S. | warm | warmcold | 1 | 1 | 2 | 3 | 4 | 4 | 4 | 4 |
| p575  | V | V10 P.S. | warm | warmcold | 1 | 1 | 1 | 3 | 4 | 4 | 4 | 4 |
| p103  | V | V3       | warm | warmcold | 1 | 1 | 2 | 3 | 4 | 4 | 5 | 5 |
| p98   | V | V3       | warm | warmcold | 1 | 2 | 3 | 3 | 4 | 4 | 4 | 4 |
| p851  | V | V5       | warm | warmcold | 1 | 2 | 3 | 3 | 4 | 4 | 4 | 5 |
| p861  | V | V5       | warm | warmcold | 1 | 1 | 3 | 3 | 4 | 4 | 4 | 5 |
| p747  | V | V6       | warm | warmcold | 1 | 1 | 1 | 3 | 3 | 4 | 4 | 4 |
| p438  | V | V7       | warm | warmcold | 1 | 1 | 2 | 3 | 4 | 4 | 4 | 4 |
| p440  | V | V7       | warm | warmcold | 1 | 1 | 2 | 3 | 4 | 4 | 4 | 4 |

|       |   |          |      |          |   |   |   |   |   |   |   |   |
|-------|---|----------|------|----------|---|---|---|---|---|---|---|---|
| p878  | V | V8 P.S.  | warm | warmcold | 1 | 1 | 2 | 3 | 3 | 4 | 4 | 4 |
| p882  | V | V8 P.S.  | warm | warmcold | 1 | 1 | 1 | 3 | 4 | 4 | 4 | 4 |
| p342  | V | V9       | warm | warmcold | 1 | 1 | 2 | 3 | 4 | 4 | 4 | 4 |
| p351  | V | V9       | warm | warmcold | 1 | 2 | 3 | 3 | 4 | 4 | 4 | 4 |
| p151  | V | ZW30     | warm | warmcold | 1 | 1 | 2 | 3 | 4 | 4 | 4 | 4 |
| p462  | Z | Z10      | warm | warmcold | 1 | 1 | 1 | 1 | 1 | 1 | 3 | 4 |
| p783  | Z | Z12 P.S. | warm | warmcold | 1 | 1 | 1 | 2 | 2 | 3 | 3 | 4 |
| p791  | Z | Z12 P.S. | warm | warmcold | 1 | 1 | 1 | 2 | 4 | 3 | 4 | 4 |
| p1018 | Z | Z14 P.S. | warm | warmcold | 1 | 1 | 1 | 1 | 2 | 3 | 3 | 4 |
| p63   | Z | Z15      | warm | warmcold | 1 | 1 | 1 | 1 | 1 | 3 | 3 | 4 |
| p923  | Z | Z2       | warm | warmcold | 1 | 1 | 1 | 1 | 1 | 1 | 2 | 3 |
| p931  | Z | Z2       | warm | warmcold | 1 | 1 | 1 | 1 | 1 | 2 | 3 | 3 |
| p659  | Z | Z3 P.S.  | warm | warmcold | 1 | 1 | 1 | 2 | 3 | 3 | 4 | 4 |
| p663  | Z | Z3 P.S.  | warm | warmcold | 1 | 1 | 1 | 1 | 3 | 3 | 4 | 4 |
| p78   | Z | Z4       | warm | warmcold | 1 | 1 | 1 | 3 | 3 | 4 | 4 | 4 |
| p86   | Z | Z4       | warm | warmcold | 1 | 1 | 1 | 2 | 3 | 3 | 4 | 4 |
| p90   | Z | Z4       | warm | warmcold | 1 | 1 | 1 | 2 | 3 | 3 | 4 | 4 |
| p375  | Z | Z5       | warm | warmcold | 1 | 1 | 1 | 2 | 3 | 4 | 4 | 4 |
| p243  | Z | Z7       | warm | warmcold | 1 | 1 | 1 | 2 | 3 | 3 | 4 | 4 |
| p274  | Z | Z9       | warm | warmcold | 1 | 1 | 1 | 2 | 3 | 3 | 3 | 4 |
| p282  | Z | Z9       | warm | warmcold | 1 | 1 | 1 | 1 | 1 | 1 | 1 | 1 |
| p906  | S | S1       | warm | warmwarm | 1 | 1 | 2 | 3 | 4 | 4 | 3 | 4 |
| p986  | S | S10      | warm | warmwarm | 1 | 1 | 3 | 3 | 4 | 4 | 4 | 4 |
| p798  | S | S11 P.S. | warm | warmwarm | 1 | 1 | 2 | 3 | 3 | 3 | 4 | 4 |
| p803  | S | S11 P.S. | warm | warmwarm | 1 | 1 | 1 | 3 | 4 | 4 | 4 | 4 |
| p807  | S | S11 P.S. | warm | warmwarm | 1 | 1 | 2 | 3 | 4 | 4 | 4 | 4 |
| p810  | S | S11 P.S. | warm | warmwarm | 1 | 1 | 1 | 2 | 3 | 3 | 3 | 4 |
| p826  | S | S13 P.S. | warm | warmwarm | 1 | 1 | 2 | 3 | 3 | 3 | 4 | 4 |
| p830  | S | S13 P.S. | warm | warmwarm | 1 | 1 | 2 | 3 | 4 | 4 | 4 | 4 |
| p838  | S | S13 P.S. | warm | warmwarm | 1 | 1 | 2 | 3 | 4 | 4 | 4 | 4 |
| p839  | S | S13 P.S. | warm | warmwarm | 1 | 1 | 2 | 3 | 4 | 4 | 4 | 4 |

|       |   |          |      |          |   |   |   |   |   |   |   |   |
|-------|---|----------|------|----------|---|---|---|---|---|---|---|---|
| p206  | S | S15      | warm | warmwarm | 1 | 1 | 1 | 3 | 4 | 4 | 4 | 4 |
| p939  | S | S18      | warm | warmwarm | 1 | 1 | 2 | 3 | 4 | 4 | 4 | 4 |
| p941  | S | S18      | warm | warmwarm | 1 | 1 | 2 | 3 | 4 | 4 | 4 | 4 |
| p971  | S | S3       | warm | warmwarm | 1 | 1 | 2 | 3 | 4 | 4 | 5 | 5 |
| p975  | S | S3       | warm | warmwarm | 1 | 1 | 2 | 3 | 4 | 4 | 4 | 4 |
| p979  | S | S3       | warm | warmwarm | 1 | 1 | 2 | 3 | 4 | 4 | 4 | 4 |
| p27   | S | S7       | warm | warmwarm | 1 | 1 | 2 | 3 | 4 | 4 | 4 | 4 |
| p30   | S | S7       | warm | warmwarm | 1 | 2 | 3 | 3 | 3 | 3 | 4 | 4 |
| p38   | S | S7       | warm | warmwarm | 1 | 1 | 3 | 3 | 4 | 4 | 4 | 4 |
| p1107 | S | S8 P.S.  | warm | warmwarm | 1 | 1 | 2 | 3 | 4 | 4 | 4 | 4 |
| p1127 | S | S8 P.S.  | warm | warmwarm | 1 | 1 | 2 | 3 | 4 | 4 | 4 | 4 |
| p722  | S | S9       | warm | warmwarm | 1 | 1 | 2 | 3 | 4 | 4 | 4 | 4 |
| p727  | S | S9       | warm | warmwarm | 1 | 1 | 1 | 2 | 1 | 2 | 3 | 4 |
| p707  | V | BR 32    | warm | warmwarm | 1 | 1 | 1 | 2 | 3 | 3 | 4 | 4 |
| p499  | V | EN32     | warm | warmwarm | 1 | 1 | 2 | 3 | 4 | 4 | 4 | 4 |
| p315  | V | OO1      | warm | warmwarm | 1 | 1 | 3 | 3 | 4 | 4 | 4 | 4 |
| p318  | V | OO1      | warm | warmwarm | 1 | 2 | 3 | 3 | 4 | 4 | 4 | 5 |
| p323  | V | OO1      | warm | warmwarm | 1 | 1 | 3 | 3 | 4 | 4 | 5 | 5 |
| p222  | V | SH1      | warm | warmwarm | 1 | 1 | 3 | 3 | 4 | 4 | 4 | 4 |
| p230  | V | SH1      | warm | warmwarm | 1 | 1 | 3 | 3 | 4 | 4 | 4 | 4 |
| p231  | V | SH1      | warm | warmwarm | 1 | 1 | 2 | 3 | 4 | 4 | 5 | 5 |
| p514  | V | V1       | warm | warmwarm | 1 | 1 | 3 | 3 | 4 | 4 | 4 | 4 |
| p519  | V | V1       | warm | warmwarm | 1 | 1 | 2 | 3 | 4 | 4 | 4 | 5 |
| p562  | V | V10 P.S. | warm | warmwarm | 1 | 1 | 3 | 3 | 5 | 5 | 5 | 5 |
| p171  | V | V2       | warm | warmwarm | 1 | 1 | 1 | 3 | 4 | 4 | 5 | 4 |
| p175  | V | V2       | warm | warmwarm | 1 | 1 | 2 | 3 | 4 | 4 | 4 | 4 |
| p179  | V | V2       | warm | warmwarm | 1 | 1 | 1 | 2 | 4 | 4 | 4 | 4 |
| p183  | V | V2       | warm | warmwarm | 1 | 1 | 3 | 3 | 4 | 4 | 4 | 4 |
| p110  | V | V3       | warm | warmwarm | 1 | 1 | 1 | 2 | 4 | 5 | 4 | 5 |
| p127  | V | V4       | warm | warmwarm | 1 | 1 | 3 | 3 | 4 | 4 | 5 | 5 |
| p131  | V | V4       | warm | warmwarm | 1 | 2 | 3 | 3 | 4 | 4 | 4 | 4 |

|       |   |          |      |          |   |   |   |   |   |   |   |   |
|-------|---|----------|------|----------|---|---|---|---|---|---|---|---|
| p139  | V | V4       | warm | warmwarm | 1 | 1 | 3 | 3 | 4 | 4 | 4 | 4 |
| p842  | V | V5       | warm | warmwarm | 1 | 1 | 2 | 3 | 4 | 4 | 3 | 5 |
| p847  | V | V5       | warm | warmwarm | 1 | 1 | 3 | 3 | 4 | 4 | 4 | 4 |
| p754  | V | V6       | warm | warmwarm | 1 | 1 | 2 | 3 | 4 | 4 | 4 | 4 |
| p433  | V | V7       | warm | warmwarm | 1 | 1 | 2 | 3 | 4 | 4 | 4 | 4 |
| p435  | V | V7       | warm | warmwarm | 1 | 1 | 3 | 3 | 4 | 4 | 4 | 4 |
| p871  | V | V8 P.S.  | warm | warmwarm | 1 | 1 | 2 | 3 | 4 | 4 | 4 | 5 |
| p875  | V | V8 P.S.  | warm | warmwarm | 1 | 1 | 2 | 2 | 2 | 3 | 3 | 4 |
| p350  | V | V9       | warm | warmwarm | 1 | 1 | 1 | 2 | 3 | 3 | 4 | 4 |
| p359  | V | V9       | warm | warmwarm | 1 | 1 | 3 | 3 | 4 | 4 | 4 | 4 |
| p155  | V | ZW30     | warm | warmwarm | 1 | 1 | 3 | 3 | 4 | 4 | 4 | 4 |
| p162  | V | ZW30     | warm | warmwarm | 1 | 1 | 1 | 3 | 4 | 4 | 4 | 4 |
| p1038 | Z | Z1       | warm | warmwarm | 1 | 1 | 1 | 2 | 2 | 3 | 4 | 4 |
| p1042 | Z | Z1       | warm | warmwarm | 1 | 1 | 1 | 1 | 1 | 2 | 3 | 4 |
| p1046 | Z | Z1       | warm | warmwarm | 1 | 1 | 1 | 3 | 4 | 4 | 4 | 4 |
| p1050 | Z | Z1       | warm | warmwarm | 1 | 1 | 2 | 3 | 4 | 4 | 4 | 4 |
| p466  | Z | Z10      | warm | warmwarm | 1 | 1 | 1 | 1 | 1 | 2 | 2 | 3 |
| p473  | Z | Z10      | warm | warmwarm | 1 | 1 | 1 | 2 | 3 | 4 | 4 | 4 |
| p474  | Z | Z10      | warm | warmwarm | 1 | 1 | 1 | 1 | 2 | 2 | 3 | 4 |
| p606  | Z | Z11 P.S. | warm | warmwarm | 1 | 1 | 1 | 2 | 3 | 4 | 4 | 4 |
| p611  | Z | Z11 P.S. | warm | warmwarm | 1 | 1 | 1 | 2 | 2 | 3 | 3 | 4 |
| p615  | Z | Z11 P.S. | warm | warmwarm | 1 | 1 | 1 | 2 | 3 | 3 | 4 | 4 |
| p619  | Z | Z11 P.S. | warm | warmwarm | 1 | 1 | 1 | 1 | 3 | 3 | 3 | 4 |
| p771  | Z | Z12 P.S. | warm | warmwarm | 1 | 1 | 1 | 1 | 3 | 3 | 4 | 4 |
| p775  | Z | Z12 P.S. | warm | warmwarm | 1 | 1 | 1 | 1 | 2 | 3 | 4 | 4 |
| p1019 | Z | Z14 P.S. | warm | warmwarm | 1 | 1 | 1 | 2 | 3 | 3 | 3 | 3 |
| p1022 | Z | Z14 P.S. | warm | warmwarm | 1 | 1 | 1 | 1 | 2 | 3 | 3 | 4 |
| p54   | Z | Z15      | warm | warmwarm | 1 | 1 | 2 | 2 | 4 | 4 | 4 | 4 |
| p58   | Z | Z15      | warm | warmwarm | 1 | 1 | 1 | 1 | 3 | 3 | 3 | 4 |
| p59   | Z | Z15      | warm | warmwarm | 1 | 1 | 1 | 2 | 4 | 4 | 4 | 4 |
| p919  | Z | Z2       | warm | warmwarm | 1 | 1 | 2 | 3 | 4 | 4 | 4 | 4 |

|       |   |          |      |          |   |   |   |   |   |   |   |   |
|-------|---|----------|------|----------|---|---|---|---|---|---|---|---|
| p655  | Z | Z3 P.S.  | warm | warmwarm | 1 | 1 | 1 | 3 | 3 | 4 | 5 | 4 |
| p83   | Z | Z4       | warm | warmwarm | 1 | 1 | 1 | 1 | 2 | 2 | 3 | 3 |
| p383  | Z | Z5       | warm | warmwarm | 1 | 1 | 3 | 3 | 4 | 4 | 4 | 4 |
| p683  | Z | Z6 P.S.  | warm | warmwarm | 1 | 1 | 2 | 3 | 4 | 4 | 4 | 4 |
| p687  | Z | Z6 P.S.  | warm | warmwarm | 1 | 1 | 3 | 3 | 4 | 4 | 4 | 4 |
| p691  | Z | Z6 P.S.  | warm | warmwarm | 1 | 1 | 2 | 3 | 4 | 4 | 4 | 4 |
| p254  | Z | Z7       | warm | warmwarm | 1 | 1 | 1 | 2 | 3 | 3 | 4 | 4 |
| p275  | Z | Z9       | warm | warmwarm | 1 | 1 | 1 | 1 | 1 | 1 | 2 | 4 |
| p283  | Z | Z9       | warm | warmwarm | 1 | 1 | 1 | 1 | 3 | 3 | 3 | 4 |
| p1002 | S | S10      | warm |          | 1 | 2 | 3 | 3 | 3 | 4 | 4 | 4 |
| p1087 | S | S12 P.S. | warm |          | 1 | 1 | 3 | 3 | 4 | 4 | 4 | 4 |
| p1097 | S | S12 P.S. | cold |          | 1 | 1 | 1 | 1 | 2 | 3 | 3 | 3 |
| p1065 | S | S14 P.S. | warm |          | 1 | 1 | 2 | 3 | 4 | 4 | 4 | 4 |
| p947  | S | S18      | warm |          | 1 | 1 | 2 | 3 | 4 | 4 | 4 | 4 |
| p967  | S | S3       | warm |          | 1 | 1 | 2 | 3 | 4 | 4 | 4 | 4 |
| p978  | S | S3       | cold |          | 1 | 1 | 1 | 2 | 2 | 3 | 3 | 4 |
| p647  | S | S4 P.S.  | warm |          | 1 | 1 | 1 | 1 | 1 | 2 | 3 | 4 |
| p42   | S | S7       | warm |          | 1 | 2 | 3 | 3 | 4 | 4 | 5 | 5 |
| p319  | V | OO1      | cold |          | 1 | 1 | 1 | 2 | 2 | 3 | 3 | 4 |
| p327  | V | OO1      | cold |          | 1 | 1 | 1 | 1 | 2 | 3 | 3 | 4 |
| p512  | V | V1       | cold |          | 1 | 1 | 1 | 1 | 2 | 2 | 3 | 3 |
| p515  | V | V1       | warm |          | 1 | 1 | 2 | 3 | 4 | 4 | 5 | 5 |
| p558  | V | V10 P.S. | warm |          | 1 | 1 | 2 | 3 | 4 | 4 | 4 | 5 |
| p111  | V | V3       | warm |          | 1 | 1 | 2 | 3 | 4 | 4 | 4 | 4 |
| p138  | V | V4       | warm |          | 1 | 1 | 2 | 3 | 4 | 4 | 4 | 4 |
| p748  | V | V6       | warm |          | 1 | 1 | 1 | 1 | 1 | 1 | 1 | 1 |
| p759  | V | V6       | warm |          | 1 | 1 | 1 | 1 | 2 | 3 | 3 | 4 |
| p347  | V | V9       | cold |          | 1 | 1 | 1 | 2 | 2 | 3 | 3 | 4 |
| p154  | V | ZW30     | warm |          | 1 | 1 | 3 | 3 | 4 | 4 | 4 | 4 |
| p1027 | Z | Z14 P.S. | warm |          | 1 | 1 | 1 | 2 | 3 | 4 | 4 | 4 |
| p927  | Z | Z2       | warm |          | 1 | 1 | 1 | 2 | 3 | 3 | 3 | 4 |

|      |   |         |      |  |   |   |   |   |   |   |   |   |
|------|---|---------|------|--|---|---|---|---|---|---|---|---|
| p934 | Z | Z2      | warm |  | 1 | 1 | 1 | 2 | 3 | 3 | 3 | 3 |
| p667 | Z | Z3 P.S. | warm |  | 1 | 1 | 1 | 1 | 3 | 3 | 4 | 4 |
| p82  | Z | Z4      | cold |  | 1 | 1 | 1 | 1 | 1 | 2 | 2 | 2 |
| p366 | Z | Z5      | warm |  | 1 | 1 | 1 | 2 | 3 | 3 | 3 | 4 |
| p371 | Z | Z5      | warm |  | 1 | 1 | 1 | 2 | 3 | 3 | 3 | 4 |
| p246 | Z | Z7      | warm |  | 1 | 1 | 1 | 1 | 1 | 1 | 3 | 3 |
| p259 | Z | Z7      | warm |  | 1 | 1 | 1 | 2 | 3 | 3 | 4 | 4 |

| plantID | bb3apr18 | bb9apr18 | se26sep18 | se16oct18 | bb18mar19 | bb29mar19 | bb5apr19 | bb10apr19 | se12sep19 |
|---------|----------|----------|-----------|-----------|-----------|-----------|----------|-----------|-----------|
| p895    | 4        | 5        | 2         | 3         | 4         | 4         | 5        | 5         | 1         |
| p985    | 4        | 4        | 3         | 4         | 2         | 2         | 3        | 5         | 3         |
| p801    | 4        | 4        | 3         | 3         | 2         | 2         | 2        | 5         | 1         |
| p802    | 4        | 4        | 3         | 3         | 3         | 4         | 5        | 5         | 1         |
| p806    | 4        | 4        | 2         | 3         | 3         | 3         | 4        | 5         | 2         |
| p811    | 3        | 4        | 2         | 3         | 1         | 1         | 2        | 3         | 1         |
| p1099   | 4        | 4        | 3         | 3         | 4         | 4         | 5        | 5         | 1         |
| p818    | 4        | 5        | 2         | 3         | 2         | 4         | 5        | 5         | 2         |
| p823    | 4        | 4        | 2         | 3         | 3         | 4         | 5        | 5         | 1         |
| p827    | 4        | 4        | 2         | 3         | 3         | 3         | 4        | 5         | 2         |
| p831    | 4        | 4        | 2         | 2         | 2         | 3         | 4        | 5         | 1         |
| p202    | 4        | 4        | 2         | 3         | 2         | 2         | 3        | 5         | 1         |
| p937    | 3        | 4        | 3         | 3         | 3         | 3         | 4        | 5         | 2         |
| p938    | 1        | 1        | 3         | 4         | 2         | 3         | 4        | 5         | 1         |
| p940    | 4        | 5        | 3         | 3         | 2         | 3         | 4        | 5         | 2         |
| p970    | 5        | 4        | 1         | 2         | 4         | 4         | 5        | 5         | 2         |
| p974    | 4        | 4        | 3         | 3         | 3         | 4         | 5        | 5         | 2         |
| p26     | 4        | 4        | 2         | 2         | 5         | 5         | 5        | 5         | 1         |
| p34     | 4        | 4        | 3         | 3         | 4         | 4         | 5        | 5         | 3         |
| p39     | 3        | 4        | 4         | 5         | 1         | 3         | 4        | 5         | 2         |
| p1106   | 4        | 4        | 2         | 2         | 3         | 4         | 5        | 5         | 2         |
| p1126   | 4        | 4        | 2         | 3         | 2         | 3         | 4        | 5         | 2         |

|      |   |   |   |   |   |   |   |   |   |
|------|---|---|---|---|---|---|---|---|---|
| p726 | 4 | 4 | 3 | 3 | 3 | 3 | 4 | 5 | 1 |
| p731 | 4 | 4 | 2 | 3 | 3 | 3 | 4 | 5 | 1 |
| p711 | 4 | 4 | 4 | 5 | 1 | 1 | 3 | 4 | 2 |
| p487 | 4 | 4 | 3 | 3 | 3 | 3 | 4 | 5 | 2 |
| p322 | 4 | 4 | 2 | 3 | 3 | 4 | 5 | 5 | 2 |
| p330 | 4 | 4 | 3 | 3 | 3 | 3 | 4 | 5 | 2 |
| p221 | 5 | 4 | 3 | 3 | 3 | 4 | 5 | 5 | 1 |
| p226 | 4 | 4 | 2 | 3 | 2 | 3 | 4 | 5 | 1 |
| p235 | 4 | 4 | 3 | 3 | 3 | 3 | 4 | 5 | 1 |
| p506 | 4 | 4 | 4 | 4 | 2 | 2 | 3 | 5 | 2 |
| p508 | 3 | 4 | 2 | 3 | 3 | 3 | 4 | 5 | 2 |
| p554 | 4 | 4 | 4 | 4 | 2 | 2 | 3 | 5 | 2 |
| p555 | 4 | 4 | 4 | 4 | 2 | 2 | 3 | 4 | 2 |
| p170 | 4 | 4 | 3 | 4 | 3 | 4 | 5 | 5 | 2 |
| p174 | 4 | 4 | 3 | 4 | 2 | 3 | 4 | 5 | 1 |
| p178 | 4 | 5 | 3 | 4 | 4 | 4 | 5 | 5 | 2 |
| p182 | 4 | 4 | 4 | 5 | 1 | 2 | 4 | 5 | 2 |
| p115 | 4 | 4 | 2 | 3 | 2 | 4 | 5 | 5 | 2 |
| p122 | 4 | 4 | 3 | 3 | 3 | 4 | 5 | 5 | 1 |
| p126 | 4 | 4 | 3 | 4 | 2 | 2 | 3 | 4 | 2 |
| p134 | 4 | 4 | 1 | 2 | 3 | 3 | 4 | 5 | 1 |
| p135 | 4 | 4 | 3 | 3 | 3 | 4 | 5 | 5 | 2 |
| p848 | 4 | 4 | 2 | 2 | 3 | 4 | 5 | 5 | 1 |
| p858 | 3 | 5 | 1 | 2 | 4 | 4 | 5 | 5 | 1 |
| p758 | 4 | 4 | 3 | 3 | 2 | 3 | 4 | 5 | 2 |
| p764 | 4 | 4 | 3 | 4 | 1 | 1 | 2 | 5 | 2 |
| p767 | 3 | 3 | 3 | 3 | 1 | 1 | 2 | 4 | 1 |
| p434 | 4 | 4 | 2 | 2 | 2 | 2 | 4 | 4 | 2 |
| p436 | 4 | 4 | 3 | 3 | 2 | 2 | 4 | 5 | 3 |
| p870 | 4 | 4 | 2 | 3 | 2 | 2 | 3 | 5 | 2 |
| p879 | 4 | 4 | 2 | 3 | 3 | 3 | 4 | 5 | 2 |



|       |   |   |   |   |   |   |   |   |   |
|-------|---|---|---|---|---|---|---|---|---|
| p339  | 4 | 4 | 4 | 4 | 3 | 4 | 5 | 5 | 2 |
| p354  | 4 | 4 | 3 | 3 | 2 | 2 | 3 | 5 | 2 |
| p158  | 4 | 4 | 2 | 3 | 2 | 3 | 4 | 5 | 2 |
| p163  | 4 | 4 | 1 | 1 | 3 | 4 | 5 | 5 | 2 |
| p1039 | 2 | 3 | 3 | 4 | 1 | 1 | 3 | 3 | 2 |
| p1043 | 3 | 4 | 2 | 4 | 1 | 1 | 2 | 5 | 2 |
| p1047 | 3 | 4 | 3 | 4 | 1 | 1 | 2 | 4 | 1 |
| p1051 | 4 | 4 | 4 | 5 | 1 | 1 | 3 | 4 | 1 |
| p467  | 4 | 4 | 4 | 4 | 1 | 1 | 3 | 5 | 2 |
| p471  | 3 | 4 | 4 | 5 | 1 | 1 | 2 | 3 | 3 |
| p475  | 1 | 3 | 3 | 5 | 1 | 1 | 2 | 2 | 2 |
| p603  | 3 | 5 | 2 | 4 | 1 | 2 | 3 | 5 | 1 |
| p607  | 3 | 3 | 3 | 3 | 1 | 1 | 2 | 4 | 1 |
| p614  | 3 | 4 | 3 | 4 | 1 | 1 | 2 | 4 | 2 |
| p618  | 3 | 4 | 4 | 5 | 1 | 1 | 3 | 3 | 2 |
| p778  | 3 | 3 | 3 | 4 | 1 | 1 | 2 | 3 | 1 |
| p786  | 4 | 4 | 3 | 4 | 2 | 2 | 3 | 5 | 2 |
| p1014 | 3 | 4 | 2 | 3 | 1 | 1 | 3 | 4 | 1 |
| p1023 | 3 | 4 | 2 | 3 | 2 | 2 | 3 | 4 | 1 |
| p1026 | 2 | 3 | 4 | 5 | 1 | 1 | 3 | 3 | 3 |
| p50   | 1 | 2 | 3 | 4 | 1 | 1 | 2 | 4 | 1 |
| p51   | 4 | 4 | 2 | 3 | 2 | 3 | 4 | 5 | 1 |
| p55   | 3 | 4 | 3 | 4 | 1 | 1 | 3 | 3 | 1 |
| p918  | 2 | 3 | 3 | 5 | 1 | 1 | 2 | 3 | 3 |
| p654  | 4 | 4 | 3 | 3 | 2 | 2 | 3 | 4 | 2 |
| p87   | 2 | 3 | 3 | 3 | 1 | 1 | 2 | 3 | 2 |
| p379  | 3 | 4 | 4 | 5 | 1 | 1 | 1 | 1 | 2 |
| p678  | 3 | 4 | 3 | 5 | 1 | 1 | 2 | 4 | 2 |
| p682  | 3 | 4 | 3 | 4 | 1 | 1 | 2 | 3 | 1 |
| p690  | 2 | 3 | 3 | 5 | 1 | 1 | 3 | 3 | 2 |
| p251  | 2 | 2 | 4 | 5 | 1 | 1 | 3 | 5 | 2 |

|       |   |   |   |   |   |   |   |   |   |
|-------|---|---|---|---|---|---|---|---|---|
| p258  | 4 | 4 | 3 | 4 | 1 | 1 | 3 | 2 | 2 |
| p271  | 3 | 4 | 4 | 5 | 1 | 1 | 2 | 2 | 2 |
| p279  | 3 | 4 | 3 | 4 | 1 | 1 | 1 | 1 | 2 |
| p898  | 4 | 4 | 2 | 2 | 2 | 2 | 3 | 5 | 2 |
| p899  | 3 | 4 | 2 | 2 | 2 | 3 | 4 | 5 | 2 |
| p907  | 4 | 4 | 1 | 3 | 4 | 5 | 5 | 5 | 1 |
| p1005 | 4 | 4 | 1 | 2 | 2 | 3 | 4 | 5 | 1 |
| p990  | 4 | 5 | 3 | 4 | 1 | 2 | 3 | 4 | 2 |
| p998  | 4 | 4 | 1 | 4 | 2 | 2 | 3 | 5 | 1 |
| p1083 | 4 | 4 | 3 | 3 | 2 | 2 | 2 | 4 | 1 |
| p1094 | 4 | 4 | 2 | 2 | 1 | 2 | 3 | 5 | 1 |
| p195  | 4 | 4 | 3 | 3 | 3 | 3 | 4 | 5 | 2 |
| p207  | 4 | 4 | 2 | 3 | 2 | 2 | 3 | 5 | 1 |
| p212  | 4 | 4 | 2 | 2 | 2 | 2 | 3 | 5 | 2 |
| p946  | 2 | 3 | 2 | 2 | 1 | 2 | 3 | 4 | 2 |
| p966  | 4 | 4 | 3 | 3 | 4 | 4 | 5 | 5 | 2 |
| p40   | 4 | 4 | 3 | 3 | 2 | 3 | 5 | 5 | 3 |
| p1111 | 4 | 4 | 3 | 3 | 5 | 5 | 5 | 5 | 2 |
| p1122 | 4 | 5 | 2 | 2 | 4 | 5 | 5 | 5 | 2 |
| p738  | 3 | 4 | 3 | 3 | 1 | 2 | 3 | 4 | 2 |
| p739  | 4 | 4 | 3 | 3 | 1 | 1 | 2 | 4 | 2 |
| p703  | 4 | 4 | 2 | 2 | 1 | 1 | 2 | 2 | 1 |
| p706  | 4 | 4 | 2 | 2 | 1 | 1 | 3 | 4 | 1 |
| p714  | 4 | 5 | 4 | 4 | 2 | 2 | 3 | 4 | 2 |
| p482  | 4 | 4 | 2 | 3 | 2 | 1 | 2 | 5 | 1 |
| p490  | 4 | 5 | 2 | 2 | 2 | 2 | 3 | 5 | 2 |
| p502  | 4 | 4 | 3 | 3 | 1 | 1 | 1 | 4 | 1 |
| p234  | 4 | 4 | 2 | 2 | 2 | 2 | 4 | 5 | 2 |
| p520  | 4 | 4 | 2 | 2 | 4 | 4 | 5 | 5 | 1 |
| p566  | 4 | 4 | 2 | 3 | 2 | 2 | 4 | 5 | 2 |
| p567  | 5 | 5 | 2 | 3 | 3 | 3 | 4 | 5 | 2 |

|       |   |   |   |   |   |   |   |   |   |
|-------|---|---|---|---|---|---|---|---|---|
| p102  | 4 | 4 | 4 | 4 | 1 | 2 | 4 | 5 | 2 |
| p107  | 5 | 4 | 3 | 3 | 2 | 2 | 3 | 5 | 2 |
| p114  | 4 | 4 | 3 | 4 | 2 | 2 | 3 | 4 | 3 |
| p850  | 4 | 5 | 2 | 3 | 3 | 3 | 4 | 5 | 2 |
| p854  | 4 | 4 | 2 | 2 | 2 | 3 | 4 | 5 | 2 |
| p750  | 3 | 4 | 3 | 3 | 1 | 1 | 1 | 3 | 2 |
| p437  | 5 | 5 | 2 | 3 | 2 | 3 | 4 | 5 | 3 |
| p439  | 4 | 4 | 3 | 3 | 1 | 1 | 2 | 5 | 2 |
| p883  | 4 | 4 | 2 | 2 | 2 | 3 | 4 | 5 | 1 |
| p886  | 1 | 3 | 3 | 3 | 1 | 1 | 2 | 2 | 2 |
| p346  | 4 | 4 | 1 | 2 | 3 | 3 | 4 | 5 | 2 |
| p150  | 4 | 4 | 3 | 3 | 1 | 1 | 2 | 4 | 2 |
| p159  | 4 | 4 | 2 | 2 | 2 | 3 | 4 | 5 | 1 |
| p463  | 3 | 4 | 3 | 4 | 1 | 1 | 2 | 3 | 2 |
| p782  | 4 | 4 | 2 | 2 | 1 | 1 | 2 | 3 | 1 |
| p787  | 3 | 4 | 3 | 4 | 1 | 1 | 3 | 3 | 2 |
| p1015 | 2 | 3 | 3 | 3 | 1 | 1 | 2 | 3 | 1 |
| p66   | 1 | 3 | 2 | 3 | 1 | 1 | 3 | 2 | 1 |
| p922  | 3 | 4 | 2 | 3 | 1 | 1 | 2 | 3 | 1 |
| p926  | 3 | 4 | 3 | 4 | 1 | 1 | 2 | 4 | 2 |
| p930  | 3 | 4 | 3 | 3 | 2 | 2 | 4 | 5 | 1 |
| p658  | 3 | 4 | 3 | 3 | 1 | 1 | 1 | 3 | 2 |
| p662  | 1 | 1 | 3 | 3 | 1 | 1 | 2 | 2 | 2 |
| p666  | 4 | 4 | 2 | 2 | 1 | 1 | 3 | 4 | 1 |
| p91   | 2 | 3 | 3 | 4 | 1 | 1 | 2 | 2 | 2 |
| p95   | 3 | 3 | 3 | 3 | 1 | 1 | 1 | 1 | 2 |
| p367  | 4 | 4 | 4 | 4 | 1 | 1 | 2 | 4 | 2 |
| p370  | 4 | 4 | 2 | 3 | 1 | 1 | 2 | 3 | 2 |
| p374  | 3 | 4 | 3 | 4 | 1 | 1 | 3 | 2 | 2 |
| p675  | 1 | 1 | 3 | 3 | 1 | 1 | 1 | 1 | 1 |
| p242  | 3 | 3 | 4 | 5 | 1 | 1 | 3 | 5 | 2 |

|       |   |   |   |   |   |   |   |   |   |
|-------|---|---|---|---|---|---|---|---|---|
| p262  | 4 | 4 | 3 | 4 | 2 | 2 | 3 | 5 | 2 |
| p270  | 3 | 4 | 2 | 3 | 1 | 1 | 3 | 3 | 1 |
| p278  | 3 | 4 | 3 | 3 | 1 | 1 | 2 | 3 | 2 |
| p894  | 5 | 5 | 1 | 1 | 3 | 3 | 4 | 5 | 2 |
| p902  | 5 | 5 | 1 | 1 | 4 | 4 | 5 | 5 | 2 |
| p903  | 5 | 5 | 1 | 1 | 5 | 5 | 5 | 5 | 2 |
| p1006 | 5 | 5 | 3 | 3 | 3 | 3 | 4 | 5 | 1 |
| p994  | 5 | 5 | 1 | 2 | 4 | 4 | 5 | 5 | 2 |
| p1082 | 5 | 5 | 2 | 3 | 3 | 3 | 4 | 5 | 2 |
| p1090 | 4 | 4 | 1 | 1 | 3 | 4 | 5 | 5 | 2 |
| p203  | 5 | 5 | 2 | 3 | 2 | 2 | 3 | 4 | 2 |
| p208  | 5 | 5 | 3 | 3 | 2 | 3 | 4 | 5 | 1 |
| p211  | 5 | 5 | 2 | 2 | 2 | 3 | 4 | 5 | 1 |
| p1119 | 5 | 5 | 1 | 2 | 3 | 4 | 5 | 5 | 2 |
| p1123 | 5 | 5 | 1 | 1 | 4 | 4 | 5 | 5 | 1 |
| p730  | 5 | 5 | 1 | 2 | 2 | 3 | 4 | 5 | 1 |
| p735  | 5 | 5 | 2 | 3 | 3 | 4 | 5 | 5 | 2 |
| p702  | 5 | 5 | 3 | 4 | 1 | 1 | 3 | 3 | 2 |
| p710  | 5 | 5 | 3 | 4 | 1 | 1 | 2 | 3 | 2 |
| p715  | 5 | 5 | 4 | 5 | 1 | 1 | 3 | 5 | 1 |
| p486  | 5 | 5 | 3 | 3 | 2 | 3 | 4 | 5 | 1 |
| p494  | 5 | 5 | 3 | 4 | 3 | 3 | 5 | 5 | 2 |
| p503  | 5 | 5 | 1 | 2 | 5 | 4 | 5 | 5 | 1 |
| p331  | 5 | 5 | 1 | 2 | 2 | 3 | 4 | 5 | 2 |
| p223  | 5 | 5 | 3 | 3 | 2 | 2 | 3 | 5 | 2 |
| p522  | 5 | 5 | 2 | 3 | 3 | 3 | 4 | 5 | 2 |
| p570  | 5 | 5 | 1 | 3 | 2 | 3 | 4 | 5 | 2 |
| p575  | 5 | 5 | 3 | 4 | 2 | 2 | 3 | 5 | 2 |
| p103  | 5 | 5 | 3 | 4 | 2 | 2 | 3 | 4 | 2 |
| p98   | 5 | 5 | 3 | 5 | 2 | 3 | 3 | 5 | 1 |
| p851  | 5 | 5 | 2 | 3 | 4 | 4 | 5 | 5 | 2 |

|       |   |   |   |   |   |   |   |   |   |
|-------|---|---|---|---|---|---|---|---|---|
| p861  | 5 | 5 |   |   | 4 | 4 | 5 | 5 | 2 |
| p747  | 5 | 5 | 1 | 1 | 5 | 5 | 5 | 5 | 1 |
| p438  | 5 | 5 | 3 | 3 | 1 | 1 | 3 | 4 | 1 |
| p440  | 5 | 5 | 4 | 4 | 1 | 1 | 2 | 4 | 1 |
| p878  | 5 | 5 | 1 | 2 | 1 | 1 | 2 | 4 | 2 |
| p882  | 5 | 5 | 1 | 2 | 4 | 4 | 5 | 5 | 2 |
| p342  | 5 | 5 | 3 | 4 | 2 | 3 | 4 | 5 | 2 |
| p351  | 5 | 5 | 3 | 3 | 4 | 4 | 5 | 5 | 2 |
| p151  | 5 | 5 | 3 | 4 | 1 | 1 | 3 | 5 | 2 |
| p462  | 5 | 5 | 3 | 4 | 1 | 1 | 1 | 1 | 2 |
| p783  | 5 | 5 | 2 | 5 | 1 | 2 | 3 | 5 | 2 |
| p791  | 5 | 5 | 3 | 4 | 1 | 1 | 2 | 5 | 1 |
| p1018 | 5 | 5 | 4 | 4 | 1 | 1 | 2 | 2 | 1 |
| p63   | 5 | 5 | 3 | 5 | 1 | 1 | 2 | 3 | 2 |
| p923  | 4 | 4 | 3 | 5 | 1 | 1 | 2 | 5 | 1 |
| p931  | 5 | 5 | 3 | 5 | 1 | 1 | 2 | 5 | 2 |
| p659  | 5 | 5 | 3 | 4 | 2 | 3 | 4 | 5 | 2 |
| p663  | 5 | 5 | 4 | 5 | 1 | 1 | 2 | 4 | 1 |
| p78   | 5 | 5 | 3 | 5 | 1 | 2 | 2 | 5 | 1 |
| p86   | 5 | 5 | 3 | 5 | 2 | 2 | 3 | 4 | 2 |
| p90   | 5 | 5 | 3 | 5 | 1 | 1 | 2 | 3 | 1 |
| p375  | 5 | 5 | 3 | 4 | 1 | 1 | 3 | 3 | 1 |
| p243  | 5 | 4 |   |   | 3 | 3 | 4 | 5 | 1 |
| p274  | 5 | 5 | 3 | 5 | 1 | 1 | 2 | 4 | 2 |
| p282  | 5 | 5 | 2 | 5 | 2 | 2 | 3 | 4 | 2 |
| p906  | 5 | 5 | 2 | 2 | 2 | 2 | 3 | 5 | 1 |
| p986  | 5 | 5 | 3 | 3 | 2 | 3 | 4 | 5 | 3 |
| p798  | 5 | 5 | 2 | 2 | 2 | 3 | 4 | 5 | 2 |
| p803  | 5 | 5 | 1 | 2 | 3 | 3 | 4 | 5 | 2 |
| p807  | 5 | 5 | 3 | 3 | 2 | 2 | 5 | 5 | 2 |
| p810  | 4 | 5 | 2 | 2 | 1 | 1 | 2 | 5 | 2 |

|       |   |   |   |   |   |   |   |   |   |
|-------|---|---|---|---|---|---|---|---|---|
| p826  | 5 | 5 | 2 | 2 | 3 | 3 | 4 | 5 | 2 |
| p830  | 5 | 5 | 2 | 2 | 2 | 3 | 4 | 5 | 2 |
| p838  | 5 | 5 | 1 | 1 | 2 | 3 | 3 | 5 | 2 |
| p839  | 5 | 5 | 2 | 2 | 3 | 4 | 5 | 5 | 2 |
| p206  | 4 | 5 | 3 | 3 | 2 | 2 | 3 | 5 | 1 |
| p939  | 5 | 5 | 2 | 2 | 2 | 3 | 4 | 5 | 2 |
| p941  | 5 | 5 | 3 | 4 | 3 | 3 | 4 | 5 | 3 |
| p971  | 5 | 5 | 1 | 2 | 4 | 4 | 5 | 5 | 1 |
| p975  | 5 | 5 | 2 | 2 | 3 | 4 | 5 | 5 | 2 |
| p979  | 5 | 5 | 2 | 2 | 2 | 2 | 3 | 5 | 1 |
| p27   | 4 | 5 | 4 | 4 | 2 | 3 | 4 | 5 | 1 |
| p30   | 5 | 5 |   |   | 4 | 5 | 5 | 5 | 1 |
| p38   | 5 | 5 | 2 | 2 | 3 | 3 | 5 | 5 | 2 |
| p1107 | 5 | 5 | 3 | 3 | 2 | 2 | 3 | 5 | 1 |
| p1127 | 5 | 5 | 1 | 2 | 3 | 4 | 5 | 5 | 1 |
| p722  | 5 | 5 | 3 | 3 | 1 | 1 | 2 | 5 | 2 |
| p727  | 5 | 5 | 3 | 4 | 1 | 1 | 2 | 4 | 1 |
| p707  | 5 | 5 | 3 | 4 | 1 | 1 | 3 | 3 | 2 |
| p499  | 5 | 5 | 3 | 3 | 2 | 2 | 3 | 4 | 2 |
| p315  | 5 | 5 | 3 | 4 | 2 | 2 | 3 | 4 | 1 |
| p318  | 5 | 5 | 3 | 3 | 2 | 2 | 3 | 5 | 2 |
| p323  | 5 | 5 | 2 | 2 | 4 | 4 | 5 | 5 | 2 |
| p222  | 5 | 5 | 2 | 3 | 2 | 3 | 4 | 5 | 2 |
| p230  | 5 | 5 | 2 | 2 | 2 | 3 | 4 | 5 | 2 |
| p231  | 5 | 5 | 2 | 2 | 3 | 4 | 5 | 5 | 2 |
| p514  | 5 | 5 |   |   | 5 | 5 | 5 | 5 | 2 |
| p519  | 5 | 5 | 2 | 3 | 3 | 4 | 5 | 5 | 1 |
| p562  | 5 | 5 | 3 | 3 | 4 | 5 | 5 | 5 | 3 |
| p171  | 5 | 5 | 3 | 3 | 1 | 1 | 2 | 4 | 2 |
| p175  | 5 | 5 | 3 | 3 | 2 | 2 | 3 | 5 | 2 |
| p179  | 5 | 5 | 2 | 3 | 1 | 1 | 2 | 3 | 2 |

|       |   |   |   |   |   |   |   |   |   |
|-------|---|---|---|---|---|---|---|---|---|
| p183  | 5 | 5 | 2 | 2 | 2 | 2 | 3 | 5 | 2 |
| p110  | 5 | 5 | 3 | 3 | 1 | 1 | 3 | 3 | 2 |
| p127  | 5 | 5 | 3 | 3 | 1 | 2 | 3 | 4 | 2 |
| p131  | 5 | 5 | 2 | 3 | 2 | 3 | 4 | 5 | 1 |
| p139  | 5 | 5 | 3 | 3 | 2 | 2 | 3 | 5 | 1 |
| p842  | 5 | 5 | 1 | 2 | 4 | 5 | 5 | 5 | 1 |
| p847  | 5 | 5 | 1 | 3 | 4 | 4 | 5 | 5 | 2 |
| p754  | 5 | 5 | 1 | 1 | 2 | 1 | 3 | 5 | 1 |
| p433  | 5 | 5 | 2 | 2 | 2 | 2 | 3 | 3 | 2 |
| p435  | 5 | 5 | 3 | 3 | 1 | 1 | 2 | 3 | 2 |
| p871  | 5 | 5 |   |   | 4 | 4 | 4 | 4 | 2 |
| p875  | 5 | 5 |   |   | 3 | 4 | 5 | 5 | 1 |
| p350  | 5 | 5 | 3 | 4 | 1 | 1 | 3 | 4 | 2 |
| p359  | 5 | 5 | 3 | 3 | 1 | 2 | 4 | 5 | 2 |
| p155  | 5 | 5 | 2 | 3 | 1 | 1 | 2 | 4 | 1 |
| p162  | 5 | 5 | 3 | 4 | 1 | 1 | 2 | 4 | 2 |
| p1038 | 5 | 5 | 1 | 2 | 2 | 2 | 3 | 4 | 1 |
| p1042 | 5 | 5 | 3 | 3 | 1 | 1 | 2 | 3 | 2 |
| p1046 | 5 | 5 | 2 | 2 | 3 | 3 | 4 | 5 | 2 |
| p1050 | 5 | 5 | 1 | 2 | 2 | 3 | 3 | 4 | 1 |
| p466  | 5 | 5 | 2 | 3 |   |   |   |   | 3 |
| p473  | 5 | 5 | 3 | 4 | 1 | 1 | 2 | 3 | 1 |
| p474  | 5 | 5 | 3 | 3 | 1 | 1 | 2 | 2 | 2 |
| p606  | 5 | 5 | 3 | 4 | 1 | 1 | 2 | 3 | 1 |
| p611  | 5 | 4 | 2 | 3 | 1 | 1 | 2 | 3 | 2 |
| p615  | 5 | 5 | 2 | 2 | 1 | 1 | 2 | 5 | 2 |
| p619  | 5 | 5 | 2 | 4 | 1 | 1 | 2 | 2 | 2 |
| p771  | 5 | 5 | 3 | 4 | 1 | 1 | 2 | 4 | 2 |
| p775  | 5 | 5 | 2 | 3 | 1 | 1 | 2 | 3 | 2 |
| p1019 | 4 | 5 | 4 | 4 | 1 | 1 | 2 | 3 | 2 |
| p1022 | 5 | 5 |   |   | 2 | 2 | 3 | 5 | 1 |

|       |   |   |   |   |   |   |   |   |   |
|-------|---|---|---|---|---|---|---|---|---|
| p54   | 5 | 5 | 3 | 4 | 1 | 1 | 2 | 3 | 1 |
| p58   | 5 | 5 | 2 | 2 | 1 | 1 | 3 | 4 | 1 |
| p59   | 5 | 5 | 4 | 4 | 1 | 1 | 2 | 4 | 1 |
| p919  | 5 | 5 | 1 | 2 | 1 | 1 | 2 | 4 | 1 |
| p655  | 4 | 5 | 3 | 3 | 1 | 1 | 3 | 5 | 3 |
| p83   | 4 | 4 | 3 | 3 | 1 | 1 | 2 | 2 | 1 |
| p383  | 5 | 5 | 3 | 4 | 2 | 2 | 3 | 5 | 3 |
| p683  | 5 | 5 | 3 | 3 | 1 | 1 | 2 | 3 | 1 |
| p687  | 5 | 5 | 2 | 2 | 2 | 2 | 3 | 4 | 1 |
| p691  | 5 | 5 | 3 | 3 | 1 | 1 | 2 | 4 | 1 |
| p254  | 5 | 5 | 2 | 4 | 2 | 2 | 3 | 5 | 2 |
| p275  | 5 | 5 | 3 | 4 | 1 | 1 | 3 | 3 | 2 |
| p283  | 5 | 5 | 3 | 3 | 1 | 1 | 2 | 4 | 2 |
| p1002 | 5 | 5 |   |   |   |   |   |   |   |
| p1087 | 5 | 5 |   |   |   |   |   |   |   |
| p1097 | 4 | 4 |   |   |   |   |   |   |   |
| p1065 | 5 | 5 |   |   |   |   |   |   |   |
| p947  | 5 | 5 |   |   |   |   |   |   |   |
| p967  | 5 | 5 |   |   |   |   |   |   |   |
| p978  | 4 | 4 |   |   |   |   |   |   |   |
| p647  | 5 | 5 |   |   |   |   |   |   |   |
| p42   | 5 | 5 |   |   |   |   |   |   |   |
| p319  | 4 | 4 |   |   |   |   |   |   |   |
| p327  | 4 | 4 |   |   |   |   |   |   |   |
| p512  | 4 | 4 |   |   |   |   |   |   |   |
| p515  | 5 | 5 |   |   |   |   |   |   |   |
| p558  | 5 | 5 |   |   |   |   |   |   |   |
| p111  | 5 | 5 |   |   |   |   |   |   |   |
| p138  | 5 | 5 |   |   |   |   |   |   |   |
| p748  | 1 | 4 |   |   |   |   |   |   |   |
| p759  | 5 | 5 |   |   |   |   |   |   |   |



|       |   |   |  |  |  |  |  |  |  |
|-------|---|---|--|--|--|--|--|--|--|
| p347  | 4 | 4 |  |  |  |  |  |  |  |
| p154  | 5 | 5 |  |  |  |  |  |  |  |
| p1027 | 5 | 5 |  |  |  |  |  |  |  |
| p927  | 5 | 5 |  |  |  |  |  |  |  |
| p934  | 4 | 4 |  |  |  |  |  |  |  |
| p667  | 5 | 5 |  |  |  |  |  |  |  |
| p82   | 3 | 4 |  |  |  |  |  |  |  |
| p366  | 4 | 5 |  |  |  |  |  |  |  |
| p371  | 5 | 5 |  |  |  |  |  |  |  |
| p246  | 4 | 4 |  |  |  |  |  |  |  |
| p259  | 5 | 5 |  |  |  |  |  |  |  |

| plantID | se15oct19 | se9nov19 | bb9mar20 | bb27mar20 | bb6apr20 | bb14apr20 | se14sep20 | se2oct20 | se23oct20 |
|---------|-----------|----------|----------|-----------|----------|-----------|-----------|----------|-----------|
| p895    | 3         | 3        | 1        | 1         | 2        | 5         | 3         | 4        | 5         |
| p985    | 4         | 5        | 1        | 1         | 2        | 4         | 5         | 5        | 5         |
| p801    | 3         | 5        | 1        | 2         | 4        | 5         | 4         | 4        | 4         |
| p802    | 1         | 2        | 1        | 3         | 4        | 5         | 4         | 4        | 4         |
| p806    | 4         | 5        | 1        | 2         | 3        | 5         | 5         | 5        | 5         |
| p811    | 1         | 4        | 1        | 1         | 2        | 4         | 3         | 3        | 4         |
| p1099   | 4         | 5        | 1        | 1         | 3        | 5         | 2         | 3        | 5         |
| p818    | 2         | 4        | 1        | 2         | 4        | 5         | 5         | 5        | 5         |
| p823    | 2         | 5        | 2        | 2         | 4        | 5         | 5         | 5        | 5         |
| p827    | 2         | 2        | 2        | 3         | 4        | 5         | 2         | 3        | 5         |
| p831    | 3         | 5        | 1        | 1         | 2        | 4         | 2         | 3        | 5         |
| p202    | 3         | 5        | 1        | 1         | 2        | 4         | 1         | 3        | 4         |
| p937    | 3         | 5        | 2        | 2         | 4        | 5         | 3         | 4        | 4         |
| p938    | 2         | 5        | 1        | 2         | 3        | 4         | 3         | 4        | 5         |
| p940    | 4         | 5        | 2        | 3         | 4        | 5         | 2         | 3        | 5         |
| p970    | 3         | 5        | 2        | 4         | 4        | 5         | 2         | 3        | 4         |
| p974    | 3         | 3        | 1        | 2         | 4        | 5         | 4         | 4        | 4         |
| p26     | 1         | 5        | 2        | 3         | 4        | 5         | 3         | 3        | 4         |

|       |   |   |   |   |   |   |   |   |   |
|-------|---|---|---|---|---|---|---|---|---|
| p34   | 5 | 5 | 2 | 3 | 3 | 4 | 5 | 5 | 5 |
| p39   | 4 | 5 | 1 | 1 | 2 | 4 | 2 | 3 | 3 |
| p1106 | 2 | 5 | 1 | 3 | 3 | 5 | 3 | 4 | 4 |
| p1126 | 3 | 5 | 1 | 2 | 3 | 4 | 4 | 5 | 5 |
| p726  | 3 | 5 | 2 | 3 | 3 | 5 | 4 | 5 | 5 |
| p731  | 1 | 3 | 2 | 3 | 4 | 5 | 4 | 4 | 5 |
| p711  | 3 | 4 | 1 | 2 | 3 | 5 | 4 | 4 | 5 |
| p487  | 2 | 5 | 2 | 2 | 3 | 5 | 3 | 4 | 5 |
| p322  | 3 | 5 | 2 | 3 | 4 | 5 | 3 | 3 | 4 |
| p330  | 3 | 5 | 1 | 2 | 3 | 5 | 4 | 4 | 5 |
| p221  | 1 | 5 | 1 | 3 | 3 | 5 | 5 | 5 | 5 |
| p226  | 3 | 4 |   |   |   |   |   |   |   |
| p235  | 2 | 5 | 1 | 2 | 3 | 5 | 4 | 4 | 4 |
| p506  | 3 | 3 | 1 | 2 | 3 | 5 | 4 | 4 | 4 |
| p508  | 4 | 4 | 2 | 3 | 4 | 5 | 2 | 3 | 4 |
| p554  | 3 | 4 | 1 | 2 | 3 | 5 | 3 | 4 | 4 |
| p555  | 3 | 4 | 2 | 3 | 4 | 5 | 2 | 3 | 4 |
| p170  | 3 | 3 | 1 | 3 | 4 | 5 | 4 | 4 | 5 |
| p174  | 3 | 5 | 1 | 3 | 4 | 5 | 3 | 4 | 4 |
| p178  | 4 | 5 | 2 | 4 | 4 | 5 | 4 | 4 | 4 |
| p182  | 4 | 4 | 1 | 2 | 3 | 5 | 4 | 4 | 5 |
| p115  | 2 | 5 | 1 | 2 | 4 | 5 | 3 | 4 | 4 |
| p122  | 2 | 5 | 1 | 1 | 2 | 4 | 3 | 4 | 5 |
| p126  | 4 | 5 | 1 | 2 | 3 | 5 | 2 | 3 | 5 |
| p134  | 3 | 4 | 1 | 2 | 3 | 5 | 3 | 3 | 4 |
| p135  | 2 | 3 | 1 | 2 | 3 | 5 | 3 | 3 | 4 |
| p848  | 2 | 4 | 1 | 2 | 3 | 5 | 4 | 4 | 4 |
| p858  | 3 | 3 | 1 | 2 | 3 | 5 | 3 | 4 | 4 |
| p758  | 2 | 4 | 1 | 2 | 3 | 5 | 1 | 3 | 4 |
| p764  | 4 | 4 | 1 | 2 | 4 | 5 | 4 | 4 | 5 |
| p767  | 3 | 4 | 1 | 1 | 2 | 4 | 3 | 4 | 4 |

|       |   |   |   |   |   |   |   |   |   |
|-------|---|---|---|---|---|---|---|---|---|
| p434  | 2 | 5 | 1 | 1 | 3 | 5 | 4 | 3 | 5 |
| p436  | 3 | 5 | 1 | 2 | 3 | 5 | 4 | 4 | 4 |
| p870  | 3 | 3 | 1 | 2 | 4 | 5 | 4 | 4 | 4 |
| p879  | 3 | 3 | 2 | 2 | 4 | 5 | 3 | 4 | 4 |
| p339  | 3 | 5 | 1 | 2 | 4 | 5 | 3 | 3 | 4 |
| p354  | 2 | 3 | 1 | 2 | 4 | 5 | 3 | 4 | 4 |
| p158  | 2 | 3 | 1 | 1 | 3 | 4 | 3 | 4 | 4 |
| p163  | 3 | 5 | 1 | 2 | 3 | 5 | 3 | 3 | 4 |
| p1039 | 3 | 5 | 1 | 1 | 2 | 2 | 1 | 3 | 4 |
| p1043 | 4 | 5 | 1 | 1 | 3 | 4 | 3 | 3 | 4 |
| p1047 | 3 | 5 | 1 | 1 | 1 | 3 | 3 | 4 | 5 |
| p1051 | 2 | 5 | 1 | 1 | 3 | 5 | 1 | 2 | 5 |
| p467  | 4 | 5 | 1 | 1 | 2 | 4 | 4 | 5 | 5 |
| p471  | 5 | 5 | 1 | 1 | 2 | 4 | 4 | 4 | 5 |
| p475  | 5 | 5 | 1 | 1 | 1 | 3 | 4 | 5 | 5 |
| p603  | 4 | 5 | 1 | 1 | 2 | 4 | 4 | 5 | 5 |
| p607  | 3 | 5 | 1 | 1 | 2 | 4 | 4 | 4 | 5 |
| p614  | 3 | 5 | 1 | 1 | 2 | 4 | 2 | 3 | 4 |
| p618  | 3 | 5 | 1 | 1 | 1 | 3 | 3 | 4 | 4 |
| p778  | 2 | 5 | 1 | 1 | 2 | 4 | 2 | 4 | 4 |
| p786  | 3 | 5 | 1 | 1 | 2 | 4 | 3 | 4 | 5 |
| p1014 | 3 | 5 | 1 | 1 | 2 | 4 | 2 | 3 | 4 |
| p1023 | 1 | 5 | 1 | 2 | 4 | 5 | 2 | 3 | 4 |
| p1026 | 5 | 5 | 1 | 1 | 1 | 4 | 4 | 5 | 5 |
| p50   | 3 | 5 | 1 | 2 | 3 | 4 | 3 | 4 | 4 |
| p51   | 4 | 5 | 1 | 1 | 2 | 4 | 3 | 4 | 4 |
| p55   | 4 | 5 | 1 | 1 | 2 | 4 | 4 | 4 | 5 |
| p918  | 5 | 5 | 1 | 1 | 2 | 3 | 4 | 4 | 5 |
| p654  | 2 | 5 | 1 | 1 | 2 | 5 | 3 | 4 | 4 |
| p87   | 3 | 5 | 1 | 1 | 2 | 4 | 5 | 5 | 5 |
| p379  | 4 | 5 | 1 | 1 | 2 | 4 | 3 | 4 | 5 |

|       |   |   |   |   |   |   |   |   |   |
|-------|---|---|---|---|---|---|---|---|---|
| p678  | 3 | 5 | 1 | 1 | 2 | 4 | 3 | 4 | 4 |
| p682  | 4 | 5 | 1 | 1 | 2 | 4 | 2 | 2 | 5 |
| p690  | 4 | 5 | 1 | 1 | 2 | 4 | 5 | 4 | 5 |
| p251  | 3 | 5 | 1 | 1 | 2 | 4 | 3 | 3 | 5 |
| p258  | 3 | 5 | 1 | 1 | 2 | 4 | 3 | 3 | 4 |
| p271  | 3 | 5 | 1 | 1 | 2 | 4 | 3 | 4 | 5 |
| p279  | 4 | 5 | 1 | 1 | 1 | 3 | 3 | 4 | 5 |
| p898  | 3 | 5 | 1 | 3 | 3 | 4 | 3 | 4 | 4 |
| p899  | 3 | 4 | 1 | 2 | 3 | 4 | 2 | 3 | 4 |
| p907  | 2 | 5 | 2 | 3 | 4 | 5 | 3 | 3 | 4 |
| p1005 | 3 | 5 | 1 | 2 | 3 | 5 | 3 | 4 | 5 |
| p990  | 4 | 5 | 2 | 2 | 3 | 4 | 2 | 3 | 4 |
| p998  | 2 | 5 | 2 | 3 | 3 | 5 | 4 | 4 | 5 |
| p1083 | 4 | 5 | 1 | 2 | 3 | 5 | 1 | 2 | 5 |
| p1094 | 2 | 4 | 1 | 1 | 2 | 5 | 5 | 5 | 4 |
| p195  | 2 | 3 | 1 | 2 | 3 | 5 | 3 | 3 | 4 |
| p207  | 3 | 5 | 1 | 1 | 3 | 4 | 2 | 3 | 4 |
| p212  | 3 | 5 | 1 | 2 | 3 | 4 | 4 | 4 | 5 |
| p946  | 3 | 5 | 1 | 1 | 2 | 4 | 1 | 4 | 5 |
| p966  | 3 | 3 | 2 | 3 | 4 | 5 | 3 | 3 | 4 |
| p40   | 5 | 5 | 1 | 1 | 3 | 3 | 3 | 4 | 4 |
| p1111 | 2 | 5 | 2 | 3 | 4 | 5 | 3 | 4 | 4 |
| p1122 | 3 | 4 | 1 | 2 | 3 | 5 | 4 | 4 | 4 |
| p738  | 3 | 3 | 1 | 2 | 3 | 4 | 3 | 4 | 3 |
| p739  | 3 | 3 | 2 | 2 | 3 | 4 | 2 | 3 | 4 |
| p703  | 1 | 4 | 1 | 2 | 3 | 5 | 2 | 3 | 4 |
| p706  | 3 | 5 | 1 | 1 | 2 | 4 | 2 | 3 | 4 |
| p714  | 3 | 5 | 2 | 3 | 3 | 5 | 3 | 4 | 4 |
| p482  | 3 | 3 | 1 | 2 | 3 | 5 | 4 | 4 | 5 |
| p490  | 3 | 5 | 1 | 1 | 2 | 5 | 2 | 3 | 4 |
| p502  | 2 | 2 | 2 | 3 | 4 | 5 | 5 | 5 | 5 |

|       |   |   |   |   |   |   |   |   |   |
|-------|---|---|---|---|---|---|---|---|---|
| p234  | 3 | 4 | 1 | 2 | 4 | 4 | 2 | 3 | 4 |
| p520  | 3 | 4 | 1 | 2 | 3 | 5 | 4 | 4 | 4 |
| p566  | 4 | 5 | 1 | 2 | 3 | 4 | 4 | 4 | 5 |
| p567  | 3 | 5 | 1 | 1 | 1 | 4 | 3 | 3 | 4 |
| p102  | 3 | 4 | 1 | 2 | 4 | 5 | 4 | 4 | 5 |
| p107  | 3 | 4 | 1 | 1 | 3 | 5 | 3 | 4 | 4 |
| p114  | 5 | 5 | 2 | 2 | 3 | 5 | 5 | 4 | 5 |
| p850  | 2 | 3 | 2 | 4 | 4 | 5 | 3 | 3 | 4 |
| p854  | 3 | 5 | 1 | 2 | 3 | 4 | 4 | 5 | 5 |
| p750  | 3 | 4 | 1 | 1 | 2 | 4 | 3 | 3 | 4 |
| p437  | 4 | 5 | 2 | 4 | 4 | 5 | 3 | 4 | 4 |
| p439  | 3 | 3 | 1 | 1 | 2 | 4 | 3 | 3 | 4 |
| p883  | 3 | 3 | 1 | 1 | 3 | 4 | 4 | 4 | 4 |
| p886  | 3 | 4 | 1 | 2 | 3 | 5 | 4 | 4 | 4 |
| p346  | 3 | 4 | 1 | 2 | 3 | 5 | 2 | 3 | 4 |
| p150  | 3 | 3 | 1 | 1 | 2 | 3 | 1 | 3 | 4 |
| p159  | 3 | 3 | 1 | 2 | 3 | 5 | 4 | 4 | 4 |
| p463  | 3 | 5 | 1 | 1 | 2 | 4 | 4 | 4 | 4 |
| p782  | 1 | 5 | 1 | 2 | 3 | 5 | 1 | 3 | 5 |
| p787  | 3 | 5 | 1 | 1 | 2 | 3 | 2 | 3 | 5 |
| p1015 | 2 | 5 | 1 | 1 | 3 | 5 | 4 | 4 | 5 |
| p66   | 3 | 5 | 1 | 1 | 2 | 4 | 2 | 2 | 5 |
| p922  | 2 | 5 | 1 | 1 | 2 | 3 | 3 | 4 | 5 |
| p926  | 2 | 5 | 1 | 1 | 2 | 3 | 2 | 3 | 4 |
| p930  | 2 | 5 | 1 | 1 | 2 | 5 | 3 | 4 | 5 |
| p658  | 3 | 5 | 1 | 1 | 3 | 4 | 4 | 4 | 5 |
| p662  | 2 | 5 | 1 | 1 | 2 | 5 | 3 | 3 | 4 |
| p666  | 1 | 5 | 1 | 2 | 3 | 4 | 2 | 5 | 3 |
| p91   | 3 | 5 | 1 | 1 | 2 | 2 | 2 | 3 | 4 |
| p95   | 5 | 5 | 1 | 1 | 2 | 4 | 4 | 4 | 5 |
| p367  | 3 | 5 | 1 | 2 | 3 | 5 | 2 | 3 | 4 |

|       |   |   |   |   |   |   |   |   |   |
|-------|---|---|---|---|---|---|---|---|---|
| p370  | 3 | 5 | 1 | 1 | 2 | 4 | 1 | 2 | 3 |
| p374  | 4 | 5 | 1 | 1 | 2 | 4 | 4 | 4 | 5 |
| p675  | 5 | 5 | 1 | 1 | 2 | 5 | 3 | 5 | 5 |
| p242  | 4 | 5 | 1 | 1 | 2 | 4 | 3 | 4 | 5 |
| p262  | 4 | 5 | 1 | 1 | 1 | 2 | 1 | 1 | 4 |
| p270  | 5 | 5 | 1 | 1 | 2 | 4 | 5 | 5 | 5 |
| p278  | 3 | 5 | 1 | 1 | 2 | 5 | 3 | 4 | 5 |
| p894  | 2 | 5 | 1 | 1 | 2 | 5 | 3 | 3 | 4 |
| p902  | 3 | 3 | 1 | 3 | 4 | 5 | 2 | 4 | 5 |
| p903  | 2 | 3 | 1 | 2 | 3 | 5 | 2 | 3 | 4 |
| p1006 | 2 | 3 | 2 | 3 | 4 | 5 | 2 | 3 | 5 |
| p994  | 3 | 5 | 1 | 2 | 3 | 4 | 2 | 3 | 4 |
| p1082 | 5 | 5 | 1 | 3 | 3 | 5 | 2 | 3 | 4 |
| p1090 | 3 | 4 | 1 | 2 | 3 | 4 | 2 | 4 | 4 |
| p203  | 3 | 3 | 2 | 2 | 3 | 4 | 2 | 3 | 3 |
| p208  | 3 | 3 | 2 | 2 | 3 | 4 | 2 | 3 | 4 |
| p211  | 3 | 3 | 1 | 1 | 2 | 3 | 3 | 3 | 5 |
| p1119 | 3 | 4 | 1 | 1 | 2 | 4 | 4 | 4 | 4 |
| p1123 | 3 | 4 | 1 | 2 | 3 | 5 | 3 | 3 | 4 |
| p730  | 4 | 4 | 1 | 3 | 4 | 5 | 4 | 5 | 5 |
| p735  | 5 | 5 | 1 | 1 | 2 | 4 | 5 | 5 | 5 |
| p702  | 4 | 5 | 1 | 1 | 3 | 3 | 3 | 4 | 4 |
| p710  | 4 | 5 | 2 | 2 | 3 | 4 | 4 | 4 | 5 |
| p715  | 3 | 5 | 1 | 2 | 3 | 5 | 3 | 4 | 5 |
| p486  | 2 | 4 | 1 | 2 | 3 | 5 | 4 | 4 | 5 |
| p494  | 4 | 5 | 1 | 2 | 3 | 5 | 3 | 4 | 5 |
| p503  | 2 | 4 | 1 | 1 | 3 | 5 | 5 | 4 | 5 |
| p331  | 3 | 5 | 1 | 2 | 3 | 4 | 3 | 3 | 4 |
| p223  | 2 | 5 | 1 | 1 | 3 | 5 | 2 | 3 | 4 |
| p522  | 3 | 3 | 2 | 3 | 4 | 5 | 2 | 4 | 4 |
| p570  | 3 | 3 | 2 | 3 | 4 | 5 | 4 | 4 | 4 |

|       |   |   |   |   |   |   |   |   |   |
|-------|---|---|---|---|---|---|---|---|---|
| p575  | 4 | 4 | 1 | 2 | 3 | 5 | 3 | 3 | 5 |
| p103  | 2 | 5 | 1 | 1 | 3 | 5 | 3 | 3 | 4 |
| p98   | 3 | 5 | 1 | 2 | 4 | 5 | 3 | 4 | 4 |
| p851  | 4 | 5 | 1 | 2 | 3 | 4 | 2 | 3 | 4 |
| p861  | 3 | 3 | 2 | 3 | 4 | 5 | 2 | 3 | 4 |
| p747  | 3 | 4 | 1 | 2 | 4 | 5 | 3 | 4 | 5 |
| p438  | 2 | 4 | 1 | 3 | 4 | 5 | 2 | 4 | 4 |
| p440  | 3 | 4 | 1 | 2 | 3 | 5 | 3 | 3 | 4 |
| p878  | 3 | 4 | 1 | 2 | 3 | 4 | 5 | 5 | 5 |
| p882  | 3 | 5 | 1 | 3 | 4 | 5 | 2 | 3 | 5 |
| p342  | 3 | 5 | 1 | 2 | 4 | 5 | 4 | 4 | 4 |
| p351  | 3 | 3 | 1 | 2 | 3 | 5 | 4 | 4 | 4 |
| p151  | 3 | 5 | 1 | 3 | 4 | 5 | 3 | 3 | 4 |
| p462  | 3 | 5 | 1 | 1 | 2 | 4 | 4 | 4 | 5 |
| p783  | 3 | 5 | 1 | 1 | 2 | 3 | 4 | 5 | 5 |
| p791  | 3 | 5 | 1 | 2 | 2 | 4 | 2 | 4 | 5 |
| p1018 | 4 | 5 | 1 | 1 | 2 | 4 | 3 | 4 | 5 |
| p63   | 4 | 5 | 1 | 1 | 2 | 4 | 3 | 4 | 5 |
| p923  | 4 | 5 | 1 | 1 | 1 | 3 | 2 | 4 | 5 |
| p931  | 3 | 5 | 1 | 1 | 2 | 5 | 2 | 3 | 4 |
| p659  | 3 | 5 | 1 | 2 | 3 | 4 | 3 | 4 | 4 |
| p663  | 4 | 5 | 1 | 1 | 2 | 3 | 4 | 4 | 5 |
| p78   | 3 | 5 | 1 | 1 | 2 | 5 | 4 | 4 | 5 |
| p86   | 4 | 5 | 1 | 1 | 2 | 4 | 4 | 4 | 5 |
| p90   | 4 | 5 | 1 | 1 | 2 | 4 | 4 | 4 | 5 |
| p375  | 2 | 4 | 1 | 2 | 3 | 4 | 1 | 3 | 4 |
| p243  | 3 | 5 | 1 | 1 | 3 | 5 | 4 | 4 | 5 |
| p274  | 4 | 5 | 1 | 1 | 3 | 4 | 3 | 4 | 5 |
| p282  | 2 | 5 | 1 | 1 | 2 | 4 | 3 | 3 | 5 |
| p906  | 2 | 4 | 1 | 1 | 3 | 5 | 2 | 3 | 4 |
| p986  | 5 | 5 | 1 | 2 | 3 | 4 | 5 | 5 | 5 |

|       |   |   |   |   |   |   |   |   |   |
|-------|---|---|---|---|---|---|---|---|---|
| p798  | 3 | 5 | 1 | 1 | 3 | 4 | 2 | 3 | 5 |
| p803  | 4 | 5 | 1 | 2 | 3 | 5 | 5 | 5 | 5 |
| p807  | 4 | 4 | 1 | 1 | 2 | 5 | 4 | 4 | 4 |
| p810  | 2 | 5 | 1 | 1 | 1 | 4 | 3 | 3 | 4 |
| p826  | 3 | 5 | 2 | 2 | 4 | 5 | 3 | 4 | 5 |
| p830  | 4 | 5 | 1 | 2 | 4 | 5 | 3 | 3 | 5 |
| p838  | 3 | 3 | 1 | 2 | 3 | 5 | 2 | 3 | 4 |
| p839  | 2 | 4 | 1 | 1 | 2 | 3 | 1 | 2 | 3 |
| p206  | 3 | 4 | 1 | 1 | 2 | 4 | 3 | 4 | 5 |
| p939  | 3 | 5 | 1 | 3 | 4 | 5 | 2 | 3 | 4 |
| p941  | 4 | 5 | 1 | 1 | 2 | 4 | 3 | 4 | 5 |
| p971  | 4 | 5 | 2 | 2 | 3 | 4 | 3 | 4 | 4 |
| p975  | 3 | 3 | 1 | 2 | 3 | 4 | 2 | 3 | 4 |
| p979  | 3 | 5 | 1 | 1 | 1 | 3 | 2 | 3 | 3 |
| p27   | 4 | 5 | 1 | 2 | 3 | 4 | 4 | 4 | 5 |
| p30   | 2 | 5 | 1 | 2 | 3 | 4 | 3 | 3 | 5 |
| p38   | 2 | 5 | 2 | 4 | 4 | 5 | 3 | 2 | 5 |
| p1107 | 3 | 4 | 1 | 1 | 2 | 4 | 3 | 4 | 4 |
| p1127 | 2 | 5 | 1 | 1 | 3 | 5 | 4 | 4 | 5 |
| p722  | 4 | 4 | 1 | 2 | 3 | 5 | 5 | 5 | 5 |
| p727  | 4 | 4 | 1 | 2 | 3 | 5 | 5 | 5 | 5 |
| p707  | 3 | 5 | 1 | 2 | 3 | 5 | 4 | 4 | 5 |
| p499  | 4 | 5 | 1 | 1 | 3 | 5 | 3 | 4 | 4 |
| p315  | 3 | 3 | 1 | 1 | 3 | 5 | 4 | 4 | 5 |
| p318  | 3 | 3 | 2 | 2 | 3 | 5 | 4 | 4 | 4 |
| p323  | 3 | 5 | 1 | 2 | 4 | 5 | 4 | 4 | 5 |
| p222  | 3 | 4 | 1 | 2 | 3 | 5 | 4 | 3 | 4 |
| p230  | 3 | 5 | 1 | 2 | 3 | 4 | 3 | 4 | 5 |
| p231  | 4 | 5 | 1 | 2 | 3 | 4 | 3 | 4 | 5 |
| p514  | 3 | 3 | 2 | 4 | 4 | 5 | 4 | 4 | 4 |
| p519  | 3 | 5 | 1 | 2 | 4 | 5 | 4 | 4 | 5 |



|       |   |   |   |   |   |   |   |   |   |
|-------|---|---|---|---|---|---|---|---|---|
| p562  | 3 | 3 | 2 | 3 | 4 | 5 | 4 | 4 | 4 |
| p171  | 3 | 3 | 1 | 2 | 3 | 5 | 3 | 3 | 4 |
| p175  | 3 | 4 | 1 | 2 | 3 | 5 | 3 | 3 | 4 |
| p179  | 3 | 5 | 1 | 1 | 2 | 4 | 3 | 4 | 5 |
| p183  | 3 | 4 | 1 | 2 | 3 | 5 | 2 | 3 | 4 |
| p110  | 3 | 5 | 1 | 1 | 3 | 5 | 3 | 3 | 4 |
| p127  | 3 | 5 | 1 | 2 | 3 | 5 | 3 | 4 | 5 |
| p131  | 1 | 4 | 2 | 3 | 4 | 5 | 4 | 4 | 4 |
| p139  | 2 | 4 | 1 | 2 | 3 | 5 | 2 | 3 | 4 |
| p842  | 1 | 2 | 2 | 3 | 4 | 5 | 2 | 3 | 4 |
| p847  | 3 | 4 | 2 | 4 | 4 | 5 | 3 | 4 | 5 |
| p754  | 2 | 3 | 1 | 2 | 4 | 5 | 2 | 3 | 4 |
| p433  | 3 | 5 | 1 | 2 | 3 | 5 | 2 | 4 | 4 |
| p435  | 4 | 5 | 1 | 1 | 3 | 5 | 4 | 4 | 5 |
| p871  | 3 | 3 | 1 | 3 | 4 | 5 | 3 | 3 | 4 |
| p875  | 2 | 3 | 2 | 3 | 4 | 5 | 4 | 4 | 4 |
| p350  | 2 | 3 | 1 | 1 | 2 | 5 | 3 | 3 | 4 |
| p359  | 3 | 3 | 1 | 2 | 3 | 5 | 3 | 3 | 4 |
| p155  | 3 | 4 | 1 | 2 | 3 | 5 | 3 | 4 | 4 |
| p162  | 3 | 5 | 1 | 2 | 3 | 5 | 4 | 4 | 4 |
| p1038 | 3 | 5 | 1 | 3 | 2 | 4 | 2 | 4 | 5 |
| p1042 | 4 | 4 | 1 | 1 | 1 | 4 | 3 | 3 | 5 |
| p1046 | 5 | 5 | 1 | 1 | 3 | 5 | 4 | 5 | 5 |
| p1050 | 4 | 5 | 1 | 1 | 2 | 4 | 3 | 5 | 5 |
| p466  | 4 | 5 | 1 | 1 | 2 | 4 | 4 | 4 | 5 |
| p473  | 5 | 5 | 1 | 1 | 2 | 3 | 4 | 5 | 5 |
| p474  | 3 | 5 | 1 | 1 | 1 | 3 | 2 | 3 | 4 |
| p606  | 3 | 5 | 1 | 1 | 2 | 4 | 2 | 3 | 5 |
| p611  | 5 | 5 | 1 | 1 | 1 | 2 | 2 | 4 | 5 |
| p615  | 4 | 5 | 1 | 2 | 3 | 4 | 3 | 3 | 4 |
| p619  | 4 | 5 | 1 | 1 | 2 | 4 | 2 | 3 | 5 |

|       |   |   |   |   |   |   |   |   |   |
|-------|---|---|---|---|---|---|---|---|---|
| p771  | 5 | 5 | 1 | 1 | 2 | 3 | 2 | 3 | 4 |
| p775  | 4 | 5 | 1 | 1 | 2 | 4 | 4 | 4 | 5 |
| p1019 | 3 | 5 | 1 | 1 | 2 | 4 | 4 | 5 | 5 |
| p1022 | 1 | 4 | 1 | 1 | 3 | 4 | 2 | 2 | 4 |
| p54   | 3 | 5 | 1 | 1 | 2 | 4 | 3 | 4 | 5 |
| p58   | 1 | 5 | 1 | 2 | 3 | 5 | 1 | 2 | 4 |
| p59   | 3 | 5 | 1 | 1 | 2 | 4 | 3 | 4 | 4 |
| p919  | 1 | 5 | 1 | 1 | 2 | 5 | 2 | 3 | 4 |
| p655  | 3 | 5 | 1 | 1 | 3 | 4 | 3 | 4 | 5 |
| p83   | 3 | 5 | 1 | 1 | 2 | 4 | 4 | 4 | 5 |
| p383  | 5 | 5 | 1 | 2 | 3 | 5 | 5 | 5 | 5 |
| p683  | 2 | 5 | 1 | 2 | 3 | 4 | 2 | 3 | 5 |
| p687  | 3 | 5 | 1 | 1 | 3 | 5 | 4 | 4 | 5 |
| p691  | 3 | 5 | 1 | 1 | 2 | 4 | 2 | 3 | 4 |
| p254  | 3 | 5 | 1 | 1 | 2 | 4 | 2 | 3 | 4 |
| p275  | 4 | 5 | 1 | 1 | 1 | 3 | 2 | 3 | 5 |
| p283  | 4 | 5 | 1 | 1 | 2 | 4 | 3 | 3 | 4 |

| plantID | h17  | h18  | h19  | h20  | hinc18 | hinc19 | hinc20 | d17  | d18  | d19 | d20  | dinc18 | dinc19 | dinc20 | cc23aug18 |
|---------|------|------|------|------|--------|--------|--------|------|------|-----|------|--------|--------|--------|-----------|
| p895    | 25,2 | 29,7 | 29   | 19,5 | 14,7   | -0,7   |        | 2,21 | 3,03 | 4,6 | 6,07 | 0,82   | 1,57   | 1,47   | 10        |
| p985    | 32,5 | 38,6 | 43,6 | 47,5 | 23,6   | 5      | 3,9    | 3,26 | 4,08 | 4,9 | 8,06 | 0,82   | 0,82   | 3,16   | 8,7       |
| p801    | 31,2 | 44   | 45,3 | 50   | 29     | 1,3    | 4,7    | 3,06 | 3,81 | 5,5 | 7,9  | 0,75   | 1,69   | 2,4    | 6,6       |
| p802    | 25,3 | 28,5 | 34,7 | 40,5 | 13,5   | 6,2    | 5,8    | 2,18 | 2,73 | 4,6 | 7,58 | 0,55   | 1,87   | 2,98   | 10,7      |
| p806    | 28,5 | 27,5 | 22,6 | 44,5 | 12,5   | -4,9   | 21,9   | 2,36 | 3,09 | 3,8 | 7,12 | 0,73   | 0,71   | 3,32   | 11,5      |
| p811    | 40,7 | 52,3 | 51,3 | 54   | 37,3   | -1     | 2,7    | 2,91 | 3,52 | 4,5 | 6,66 | 0,61   | 0,98   | 2,16   | 10,4      |
| p1099   | 33,6 | 38,1 | 43,9 | 50   | 23,1   | 5,8    | 6,1    | 2,33 | 2,57 | 4,3 | 6,18 | 0,24   | 1,73   | 1,88   | 11,1      |
| p818    | 31,6 | 27,6 | 32,7 | 37   | 12,6   | 5,1    | 4,3    | 3,42 | 3,55 | 5,2 | 8,86 | 0,13   | 1,65   | 3,66   | 11        |
| p823    | 32,1 | 33,9 | 34,2 | 41,5 | 18,9   | 0,3    | 7,3    | 3,24 | 2,94 | 6,5 | 9,27 | -0,3   | 3,56   | 2,77   | 10,9      |
| p827    | 27,6 | 32,4 | 34   | 37   | 17,4   | 1,6    | 3      | 2,61 | 2,84 | 4,1 | 6,69 | 0,23   | 1,26   | 2,59   | 9,5       |
| p831    | 41,3 | 34,2 | 55,9 | 38,5 | 19,2   | 21,7   |        | 3,29 | 3,43 | 4   | 6,8  | 0,14   | 0,57   | 2,8    | 14,2      |
| p202    | 45   | 42,3 | 43,1 | 46   | 27,3   | 0,8    | 2,9    | 2,77 | 3,48 | 4,2 | 6,48 | 0,71   | 0,72   | 2,28   | 12,4      |

|       |      |      |      |      |      |      |      |      |      |     |      |       |      |      |      |
|-------|------|------|------|------|------|------|------|------|------|-----|------|-------|------|------|------|
| p937  | 30,2 | 30   | 33,1 | 38   | 15   | 3,1  | 4,9  | 2,85 | 2,88 | 5,1 | 7,38 | 0,03  | 2,22 | 2,28 | 11,4 |
| p938  | 46   | 53   | 52,4 | 55   | 38   | -0,6 | 2,6  | 3,21 | 3,99 | 4,9 | 8,23 | 0,78  | 0,91 | 3,33 | 9,6  |
| p940  | 47,3 | 45,4 | 45,4 | 48   | 30,4 | 0    | 2,6  | 2,61 | 3,88 | 4,5 | 7,5  | 1,27  | 0,62 | 3    | 14,8 |
| p970  | 26,8 | 31,3 | 34,6 | 41,5 | 16,3 | 3,3  | 6,9  | 2,33 | 2,77 | 4   | 6,79 | 0,44  | 1,23 | 2,79 | 13,7 |
| p974  | 32,8 | 31   | 33,6 | 39   | 16   | 2,6  | 5,4  | 3,57 | 3,16 | 4,4 | 7,11 | -0,41 | 1,24 | 2,71 | 7,3  |
| p26   | 25,2 | 27,6 | 30,2 | 37   | 12,6 | 2,6  | 6,8  | 2,27 | 2,89 | 5,8 | 7,59 | 0,62  | 2,91 | 1,79 | 8,7  |
| p34   | 29,8 | 35,7 | 39,5 | 25,5 | 20,7 | 3,8  |      | 2,21 | 2,42 | 3,8 | 5,73 | 0,21  | 1,38 | 1,93 | 7,5  |
| p39   | 53,8 | 37,6 | 38   | 38,5 | 22,6 | 0,4  | 0,5  | 3,09 | 4,06 | 4,9 | 8,28 | 0,97  | 0,84 | 3,38 | 5,7  |
| p1106 | 22,6 | 27,6 | 27,7 | 36   | 12,6 | 0,1  | 8,3  | 2,67 | 3,57 | 5   | 7,13 | 0,9   | 1,43 | 2,13 | 9,5  |
| p1126 | 24,8 | 34,2 | 56,9 | 36,5 | 19,2 | 22,7 |      | 2,43 | 2,79 | 3,9 | 7,02 | 0,36  | 1,11 | 3,12 | 4,7  |
| p726  | 29,4 | 33,6 | 36,2 | 47,5 | 18,6 | 2,6  | 11,3 | 2,18 | 2,37 | 5,2 | 9,23 | 0,19  | 2,83 | 4,03 | 9,6  |
| p731  | 29,5 | 37,5 | 56   | 40,5 | 22,5 | 18,5 |      | 2,38 | 2,93 | 4,4 | 6,8  | 0,55  | 1,47 | 2,4  | 13,1 |
| p711  | 40,8 | 40,1 | 41,9 | 72   | 25,1 | 1,8  | 30,1 | 3,05 | 3,66 | 5,6 | 8,75 | 0,61  | 1,94 | 3,15 | 8    |
| p487  | 37,5 | 38,6 | 40   | 55   | 23,6 | 1,4  | 15   | 2,56 | 2,86 | 4,5 | 7,35 | 0,3   | 1,64 | 2,85 | 7,1  |
| p322  | 25,7 | 30,1 | 35,8 | 45   | 15,1 | 5,7  | 9,2  | 2,2  | 3,23 | 4,6 | 7,5  | 1,03  | 1,37 | 2,9  | 11,7 |
| p330  | 29,6 | 31,9 | 38,8 | 43,5 | 16,9 | 6,9  | 4,7  | 2,19 | 2,4  | 4,2 | 6,7  | 0,21  | 1,8  | 2,5  | 7,4  |
| p221  | 44,3 | 38   | 46,1 | 53   | 23   | 8,1  | 6,9  | 2,63 | 3,23 | 3,8 | 8,03 | 0,6   | 0,57 | 4,23 | 7,7  |
| p226  | 38   | 32,7 | 55,6 |      |      |      |      |      | 2,88 | 5   |      |       |      |      | 9,8  |
| p235  | 51,1 | 40,6 | 37   | 54,5 | 25,6 | -3,6 | 17,5 | 4,38 | 4,37 | 4,5 | 8,43 | -0,01 | 0,13 | 3,93 | 7,9  |
| p506  | 45,1 | 34,3 | 38,5 | 51   | 19,3 | 4,2  | 12,5 | 3,58 | 2,83 | 5,5 | 8,56 | -0,75 | 2,67 | 3,06 | 6,4  |
| p508  | 37   | 25,1 | 27,1 | 29,5 | 10,1 | 2    | 2,4  | 3,47 | 3,34 | 3,9 | 7,08 | -0,13 | 0,56 | 3,18 | 10,1 |
| p554  | 55   | 52   | 50,4 | 65   | 37   | -1,6 | 14,6 | 3,5  | 3,71 | 4,7 | 7,75 | 0,21  | 0,99 | 3,05 | 4,5  |
| p555  | 53,4 | 62   | 67,5 | 75   | 47   | 5,5  | 7,5  | 3,98 | 4,22 | 4,4 | 7,9  | 0,24  | 0,18 | 3,5  | 5,4  |
| p170  | 47,7 | 39,6 | 41,9 | 46,5 | 24,6 | 2,3  | 4,6  | 3,66 | 3,91 | 5,9 | 7,88 | 0,25  | 1,99 | 1,98 | 7,2  |
| p174  | 47   | 42,4 | 48,6 | 54   | 27,4 | 6,2  | 5,4  | 3,18 | 3,51 | 5,4 | 7,83 | 0,33  | 1,89 | 2,43 | 6,6  |
| p178  | 53   | 45,3 | 48,1 | 57   | 30,3 | 2,8  | 8,9  | 3,7  | 4,27 | 5   | 8,61 | 0,57  | 0,73 | 3,61 | 8,6  |
| p182  | 46   | 40,8 | 40,9 | 49,5 | 25,8 | 0,1  | 8,6  | 3,34 | 4,07 | 5,3 | 7,44 | 0,73  | 1,23 | 2,14 | 6,4  |
| p115  | 39,4 | 33,9 | 37,9 | 47   | 18,9 | 4    | 9,1  | 3,32 | 4,25 | 5,2 | 8,75 | 0,93  | 0,95 | 3,55 | 8,1  |
| p122  | 47,2 | 39,4 | 43,7 | 46   | 24,4 | 4,3  | 2,3  | 3,13 | 3,83 | 5,2 | 7,69 | 0,7   | 1,37 | 2,49 | 5,3  |
| p126  | 50,5 | 43,5 | 46,4 | 56   | 28,5 | 2,9  | 9,6  | 3,27 | 4,08 | 4,2 | 7,65 | 0,81  | 0,12 | 3,45 | 8,6  |
| p134  | 28,8 | 25,9 | 31,8 | 37   | 10,9 | 5,9  | 5,2  | 2,57 | 2,46 | 3,2 | 7,27 | -0,11 | 0,74 | 4,07 | 11,3 |

|       |      |      |      |      |      |      |      |      |      |     |      |       |       |      |      |
|-------|------|------|------|------|------|------|------|------|------|-----|------|-------|-------|------|------|
| p135  | 37,6 | 25,3 | 25,9 | 33   | 10,3 | 0,6  | 7,1  | 2,57 | 3,81 | 5,1 | 7,49 | 1,24  | 1,29  | 2,39 | 8,7  |
| p848  | 22   | 25   | 31,1 | 50   | 10   | 6,1  | 18,9 | 2,63 | 2,89 | 4,4 | 8,05 | 0,26  | 1,51  | 3,65 | 6,1  |
| p858  | 23,1 | 23,3 | 29,8 | 46   | 8,3  | 6,5  | 16,2 | 1,47 | 2    | 5   | 8,47 | 0,53  | 3     | 3,47 | 10   |
| p758  | 26   | 37,7 | 38,1 | 52   | 22,7 | 0,4  | 13,9 | 2,34 | 3,09 | 5,6 | 9,09 | 0,75  | 2,51  | 3,49 | 9,3  |
| p764  | 39   | 39,7 | 40,9 | 48   | 24,7 | 1,2  | 7,1  | 3,39 | 2,83 | 4,2 | 7,5  | -0,56 | 1,37  | 3,3  | 6,4  |
| p767  | 46,5 | 26,8 | 27,9 | 42,5 | 11,8 | 1,1  | 14,6 | 3,53 | 3,79 | 4,8 | 7,71 | 0,26  | 1,01  | 2,91 | 7,4  |
| p434  | 66,7 | 52,8 | 54,4 | 74   | 37,8 | 1,6  | 19,6 | 3,17 | 3,72 | 5,3 | 9,2  | 0,55  | 1,58  | 3,9  | 8,4  |
| p436  | 58   | 47,5 | 47   | 53,5 | 32,5 | -0,5 | 6,5  | 3,63 | 4,76 | 4,8 | 8,21 | 1,13  | 0,04  | 3,41 | 7,5  |
| p870  | 34,2 | 44,4 | 48,5 | 56,5 | 29,4 | 4,1  | 8    | 2,73 | 3,05 | 4,4 | 8,93 | 0,32  | 1,35  | 4,53 | 7,7  |
| p879  | 23,1 | 23,9 | 27,1 | 46   | 8,9  | 3,2  | 18,9 | 2,61 | 3,08 | 4,9 | 7,74 | 0,47  | 1,82  | 2,84 | 9,3  |
| p339  | 32,6 | 29,5 | 30,8 | 54   | 14,5 | 1,3  | 23,2 | 2,48 | 2,68 | 4,4 | 7,53 | 0,2   | 1,72  | 3,13 | 5,4  |
| p354  | 47,8 | 39,7 | 42,2 | 51,5 | 24,7 | 2,5  | 9,3  | 3,22 | 3,78 | 3,7 | 6,81 | 0,56  | -0,08 | 3,11 | 7,5  |
| p158  | 44,6 | 36,7 | 37,9 | 52,5 | 21,7 | 1,2  | 14,6 | 2,69 | 3,07 | 4,3 | 7,8  | 0,38  | 1,23  | 3,5  | 10,6 |
| p163  | 39,1 | 33,5 | 38,2 | 48   | 18,5 | 4,7  | 9,8  | 2,12 | 3,48 | 5,2 | 8,16 | 1,36  | 1,72  | 2,96 | 17,2 |
| p1039 | 29,2 | 44,7 | 46,1 | 51   | 29,7 | 1,4  | 4,9  | 2,72 | 3,27 | 3,8 | 8,52 | 0,55  | 0,53  | 4,72 | 10,7 |
| p1043 | 39,6 | 29,7 | 29,6 | 33,5 | 14,7 | -0,1 | 3,9  | 2,38 | 2,51 | 3,5 | 5,84 | 0,13  | 0,99  | 2,34 | 9,2  |
| p1047 | 40,2 | 41   | 45,8 | 49,5 | 26   | 4,8  | 3,7  | 2,69 | 2,67 | 4   | 9,44 | -0,02 | 1,33  | 5,44 | 10   |
| p1051 | 35,4 | 28,2 | 28   | 31,5 | 13,2 | -0,2 | 3,5  | 2,92 | 2,83 | 2,7 | 5    | -0,09 | -0,13 | 2,3  | 5    |
| p467  | 48,7 | 39   | 39,2 | 40   | 24   | 0,2  | 0,8  | 2,9  | 3,21 | 4,2 | 6,16 | 0,31  | 0,99  | 1,96 | 4,1  |
| p471  | 40,3 | 30,8 | 31,7 | 37,5 | 15,8 | 0,9  | 5,8  | 2,56 | 2,65 | 2,9 | 4,87 | 0,09  | 0,25  | 1,97 | 5    |
| p475  | 33,2 | 39,6 | 42,6 | 44,5 | 24,6 | 3    | 1,9  | 1,95 | 2,41 | 4   | 4,84 | 0,46  | 1,59  | 0,84 | 6,1  |
| p603  | 38,8 | 35   | 38   | 39   | 20   | 3    | 1    | 3,18 | 3,41 | 4,6 | 8,13 | 0,23  | 1,19  | 3,53 | 6,8  |
| p607  | 45,7 | 33,6 | 36,5 | 40,5 | 18,6 | 2,9  | 4    | 2,72 | 2,91 | 4,1 | 7,25 | 0,19  | 1,19  | 3,15 | 7,5  |
| p614  | 29,5 | 39,2 | 43,1 | 42   | 24,2 | 3,9  | -1,1 | 2,4  | 2,67 | 4,2 | 6,97 | 0,27  | 1,53  | 2,77 | 8,3  |
| p618  | 38,5 | 39,7 | 41,4 | 44   | 24,7 | 1,7  | 2,6  | 3,09 | 3,68 | 4,4 | 8,2  | 0,59  | 0,72  | 3,8  | 5,6  |
| p778  | 38,6 | 28,8 | 31,7 | 37,5 | 13,8 | 2,9  | 5,8  | 2,88 | 3,77 | 4,2 | 6,64 | 0,89  | 0,43  | 2,44 | 11,9 |
| p786  | 30,9 | 35   | 36   | 44   | 20   | 1    | 8    | 2,23 | 2,46 | 2,9 | 6,7  | 0,23  | 0,44  | 3,8  | 5,7  |
| p1014 | 38,5 | 39,3 | 40,1 | 42   | 24,3 | 0,8  | 1,9  | 2,8  | 3,04 | 4,2 | 7,05 | 0,24  | 1,16  | 2,85 | 8,8  |
| p1023 | 35,6 | 33,3 | 32,2 | 38   | 18,3 | -1,1 | 5,8  | 2,28 | 2,28 | 3,5 | 4,91 | 0     | 1,22  | 1,41 | 8,4  |
| p1026 | 51,2 | 47,2 | 46,9 | 48   | 32,2 | -0,3 | 1,1  | 3,76 | 3,46 | 5,1 | 7,04 | -0,3  | 1,64  | 1,94 | 6,7  |
| p50   | 29   | 32,4 | 31   | 38   | 17,4 | -1,4 | 7    | 2,42 | 2,84 | 4,4 | 6,54 | 0,42  | 1,56  | 2,14 | 5,1  |

|       |      |      |      |      |      |      |      |      |      |     |      |       |      |      |      |
|-------|------|------|------|------|------|------|------|------|------|-----|------|-------|------|------|------|
| p51   | 28,7 | 33,1 | 37,8 | 37   | 18,1 | 4,7  | -0,8 | 2,13 | 2,33 | 3,9 | 6,37 | 0,2   | 1,57 | 2,47 | 11,1 |
| p55   | 33,6 | 37,8 | 40,5 | 51,5 | 22,8 | 2,7  | 11   | 2,58 | 3,1  | 5,3 | 7,96 | 0,52  | 2,2  | 2,66 | 7,2  |
| p918  | 30,3 | 34,5 | 39,9 | 46   | 19,5 | 5,4  | 6,1  | 2,73 | 2,85 | 3,8 | 6,16 | 0,12  | 0,95 | 2,36 | 7,8  |
| p654  | 22,2 | 35,8 | 41   | 58,5 | 20,8 | 5,2  | 17,5 | 3,07 | 3,18 | 4,2 | 8,09 | 0,11  | 1,02 | 3,89 | 9,4  |
| p87   | 30   | 38,1 | 39,9 | 48   | 23,1 | 1,8  | 8,1  | 2,08 | 2,63 | 3,4 | 5,61 | 0,55  | 0,77 | 2,21 | 6,7  |
| p379  | 39,7 | 47,7 | 47,3 | 47,5 | 32,7 | -0,4 | 0,2  | 2,82 | 3,5  | 3,8 | 6,88 | 0,68  | 0,3  | 3,08 | 6,7  |
| p678  | 37,3 | 32   | 34,3 | 43   | 17   | 2,3  | 8,7  | 2,96 | 3,09 | 3,7 | 8,8  | 0,13  | 0,61 | 5,1  | 4,7  |
| p682  | 32,3 | 35   | 36,1 | 37,5 | 20   | 1,1  | 1,4  | 2,44 | 2,92 | 4,1 | 6,37 | 0,48  | 1,18 | 2,27 | 9,1  |
| p690  | 35,2 | 37,9 | 40,2 | 48   | 22,9 | 2,3  | 7,8  | 2,92 | 3,36 | 5,6 | 7,4  | 0,44  | 2,24 | 1,8  | 6,3  |
| p251  | 31,1 | 23,5 | 24,4 | 31   | 8,5  | 0,9  | 6,6  | 2,42 | 3,02 | 3,5 | 6,28 | 0,6   | 0,48 | 2,78 | 5,7  |
| p258  | 31,2 | 37   | 39   | 51   | 22   | 2    | 12   | 2,28 | 2,33 | 4,2 | 6,2  | 0,05  | 1,87 | 2    | 6    |
| p271  | 38,7 | 40,6 | 40,2 | 49   | 25,6 | -0,4 | 8,8  | 2,5  | 3,01 | 3,7 | 7,34 | 0,51  | 0,69 | 3,64 | 5,3  |
| p279  | 43,4 | 39,6 | 39,2 | 37,5 | 24,6 | -0,4 | -1,7 | 3,14 | 3,24 | 4,7 | 6,46 | 0,1   | 1,46 | 1,76 | 5,5  |
| p898  | 40,6 | 34,7 | 46,5 | 49,5 | 19,7 | 11,8 | 3    | 3,07 | 3,65 | 4,8 | 8,55 | 0,58  | 1,15 | 3,75 | 11,3 |
| p899  | 46,2 | 47,2 | 52,2 | 60,5 | 32,2 | 5    | 8,3  | 3,41 | 4,17 | 6,2 | 8,72 | 0,76  | 2,03 | 2,52 | 17   |
| p907  | 29,6 | 31,7 | 27,1 | 38   | 16,7 | -4,6 | 10,9 | 2,4  | 2,75 | 4,4 | 7,48 | 0,35  | 1,65 | 3,08 | 13,5 |
| p1005 | 33,5 | 24,9 | 30,1 | 35   | 9,9  | 5,2  | 4,9  | 2,74 | 2,66 | 4,8 | 6,91 | -0,08 | 2,14 | 2,11 |      |
| p990  | 38,1 | 51,9 | 57   | 58   | 36,9 | 5,1  | 1    | 3,08 | 3,31 | 4,5 | 9,54 | 0,23  | 1,19 | 5,04 | 11,2 |
| p998  | 36   | 27,4 | 24,8 | 28,5 | 12,4 | -2,6 | 3,7  | 2,37 | 2,74 | 3,5 | 6,08 | 0,37  | 0,76 | 2,58 | 14,8 |
| p1083 | 30,3 | 35   | 38,5 | 44   | 20   | 3,5  | 5,5  | 1,87 | 2,31 | 2,8 | 5,2  | 0,44  | 0,49 | 2,4  | 14,4 |
| p1094 | 45,6 | 50   | 50,9 | 58   | 35   | 0,9  | 7,1  | 3,3  | 3,55 | 5,7 | 8,79 | 0,25  | 2,15 | 3,09 | 17,2 |
| p195  | 32,1 | 38,6 | 41,2 | 46   | 23,6 | 2,6  | 4,8  | 2,57 | 3,7  | 3,9 | 9,47 | 1,13  | 0,2  | 5,57 | 8,4  |
| p207  | 29,7 | 40,8 | 41,2 | 42   | 25,8 | 0,4  | 0,8  | 1,8  | 2,74 | 3,9 | 7,32 | 0,94  | 1,16 | 3,42 | 10,7 |
| p212  | 38,7 | 52,4 | 52,1 | 51   | 37,4 | -0,3 | -1,1 | 2,88 | 3,29 | 5,3 | 7,45 | 0,41  | 2,01 | 2,15 | 9,5  |
| p946  | 35,7 | 35,9 | 32,1 | 42,5 | 20,9 | -3,8 | 10,4 | 2,52 | 3,04 | 5,1 | 7,47 | 0,52  | 2,06 | 2,37 | 20   |
| p966  | 38,6 | 38,4 | 40,8 | 47   | 23,4 | 2,4  | 6,2  | 3,24 | 3,79 | 4,4 | 7,9  | 0,55  | 0,61 | 3,5  | 10,9 |
| p40   | 38   | 42   | 41,8 | 44   | 27   | -0,2 | 2,2  | 2,75 | 4,56 | 6,4 | 9,23 | 1,81  | 1,84 | 2,83 | 6,5  |
| p1111 | 22,4 | 24   | 30,8 | 38   | 9    | 6,8  | 7,2  | 2,75 | 2,6  | 5,6 | 8,38 | -0,15 | 3    | 2,78 | 12,5 |
| p1122 | 28,1 | 26,8 | 29,6 | 34,5 | 11,8 | 2,8  | 4,9  | 2,97 | 2,86 | 6,3 | 8,95 | -0,11 | 3,44 | 2,65 | 12   |
| p738  | 33,6 | 35,4 | 39,4 | 44   | 20,4 | 4    | 4,6  | 2,63 | 2,62 | 4,6 | 7,4  | -0,01 | 1,98 | 2,8  | 8,5  |
| p739  | 38   | 49,4 | 54,1 | 57   | 34,4 | 4,7  | 2,9  | 2,65 | 3    | 4,2 | 7,75 | 0,35  | 1,2  | 3,55 | 9,9  |

|       |      |      |      |      |      |      |      |      |      |     |       |       |      |      |      |
|-------|------|------|------|------|------|------|------|------|------|-----|-------|-------|------|------|------|
| p703  | 32,5 | 50,1 | 50,5 | 52   | 35,1 | 0,4  | 1,5  | 1,92 | 2,4  | 3,5 | 6,36  | 0,48  | 1,1  | 2,86 | 12,2 |
| p706  | 36   | 38   | 38,3 | 45   | 23   | 0,3  | 6,7  | 2,75 | 3,03 | 4,7 | 7,9   | 0,28  | 1,67 | 3,2  | 10,3 |
| p714  | 44,7 | 42,7 | 42,6 | 42,5 | 27,7 | -0,1 | -0,1 | 3,09 | 3,74 | 4,6 | 7,46  | 0,65  | 0,86 | 2,86 | 5,8  |
| p482  | 49,7 | 40,2 | 42,8 | 55   | 25,2 | 2,6  | 12,2 | 3,08 | 3,69 | 5,2 | 7,5   | 0,61  | 1,51 | 2,3  | 9,4  |
| p490  | 33   | 30,3 | 32,1 | 24   | 15,3 | 1,8  |      | 2,11 | 2,83 | 3,7 | 6,24  | 0,72  | 0,87 | 2,54 | 12,5 |
| p502  | 49,7 | 44,2 | 46   | 58   | 29,2 | 1,8  | 12   | 3,64 | 4,58 | 6,3 | 8,44  | 0,94  | 1,72 | 2,14 | 7,8  |
| p234  | 31,3 | 36,1 | 42,4 | 44   | 21,1 | 6,3  | 1,6  | 2,61 | 3,05 | 5,3 | 8,84  | 0,44  | 2,25 | 3,54 | 8,7  |
| p520  | 24,8 | 26   | 42,8 | 58   | 11   | 16,8 | 15,2 | 2,15 | 2,57 | 5,7 | 8,63  | 0,42  | 3,13 | 2,93 | 11,2 |
| p566  | 47,6 | 67,5 | 76,4 | 89,5 | 52,5 | 8,9  | 13,1 | 3,65 | 4,5  | 7,7 | 10,08 | 0,85  | 3,2  | 2,38 | 11,2 |
| p567  | 41,5 | 30   | 32,8 | 32   | 15   | 2,8  | -0,8 | 3,12 | 3,06 | 3,9 | 5,36  | -0,06 | 0,84 | 1,46 | 11,2 |
| p102  | 49,5 | 33,7 | 57,6 | 70   | 18,7 | 23,9 | 12,4 | 3,25 | 3,63 | 4,3 | 7,41  | 0,38  | 0,67 | 3,11 | 10,4 |
| p107  | 47,5 | 52,6 | 55,1 | 65   | 37,6 | 2,5  | 9,9  | 3,7  | 5,06 | 7,8 | 9,95  | 1,36  | 2,74 | 2,15 | 8    |
| p114  | 54,3 | 49,2 | 55,1 | 60   | 34,2 | 5,9  | 4,9  | 3,28 | 3,84 | 5   | 7,87  | 0,56  | 1,16 | 2,87 | 10,4 |
| p850  | 40,2 | 35   | 37,4 | 49   | 20   | 2,4  | 11,6 | 3,26 | 3,11 | 4   | 8,46  | -0,15 | 0,89 | 4,46 | 8,8  |
| p854  | 35,2 | 31   | 33,5 | 47,5 | 16   | 2,5  | 14   | 2,75 | 2,4  | 4   | 6,84  | -0,35 | 1,6  | 2,84 | 8,4  |
| p750  | 48,6 | 50,9 | 48,6 | 83,5 | 35,9 | -2,3 | 34,9 | 3,33 | 3,45 | 7,8 | 9,94  | 0,12  | 4,35 | 2,14 | 9,2  |
| p437  | 67,2 | 49,9 | 52,4 | 66   | 34,9 | 2,5  | 13,6 | 4,1  | 4,6  | 6,5 | 11,08 | 0,5   | 1,9  | 4,58 | 7,6  |
| p439  | 50,4 | 55   | 62,4 | 64,5 | 40   | 7,4  | 2,1  | 2,9  | 3,33 | 5,3 | 10,72 | 0,43  | 1,97 | 5,42 | 8,3  |
| p883  | 52,2 | 37,5 | 55,4 | 61   | 22,5 | 17,9 | 5,6  | 3,52 | 3,75 | 4,8 | 8,32  | 0,23  | 1,05 | 3,52 | 9,2  |
| p886  | 62,2 | 51,7 | 61,5 | 88,5 | 36,7 | 9,8  | 27   | 3,59 | 3,49 | 5,1 | 7,96  | -0,1  | 1,61 | 2,86 | 7,9  |
| p346  | 31,5 | 31   | 33,8 | 48   | 16   | 2,8  | 14,2 | 3,02 | 2,36 | 4,7 | 7,6   | -0,66 | 2,34 | 2,9  | 12   |
| p150  | 56,6 | 57,5 | 57,5 | 42,5 | 42,5 | 0    |      | 3,49 | 4,11 | 5,3 | 8,46  | 0,62  | 1,19 | 3,16 | 11,4 |
| p159  | 41,5 | 41,3 | 44,8 | 50   | 26,3 | 3,5  | 5,2  | 2,71 | 2,98 | 6,3 | 9,51  | 0,27  | 3,32 | 3,21 | 11,1 |
| p463  | 45,1 | 47   | 47,4 | 53   | 32   | 0,4  | 5,6  | 3,12 | 3,97 | 4,5 | 8,15  | 0,85  | 0,53 | 3,65 | 5,2  |
| p782  | 28   | 31,8 | 29,8 | 41   | 16,8 | -2   | 11,2 | 2,14 | 2,36 | 3,1 | 6,85  | 0,22  | 0,74 | 3,75 | 8,2  |
| p787  | 34,3 | 33,4 | 38   | 19   | 18,4 | 4,6  |      | 2,54 | 3,29 | 4   | 5,49  | 0,75  | 0,71 | 1,49 | 7,8  |
| p1015 | 39,6 | 37,1 | 39,2 | 47,5 | 22,1 | 2,1  | 8,3  | 2,69 | 2,78 | 4,6 | 7,41  | 0,09  | 1,82 | 2,81 | 7,3  |
| p66   | 42,7 | 39,5 | 40,1 | 43   | 24,5 | 0,6  | 2,9  | 2,43 | 2,5  | 4,6 | 6,8   | 0,07  | 2,1  | 2,2  | 8,8  |
| p922  | 33,8 | 36   | 42,1 | 53   | 21   | 6,1  | 10,9 | 2,49 | 2,74 | 3,9 | 6,8   | 0,25  | 1,16 | 2,9  | 11,5 |
| p926  | 38,9 | 36,7 | 46,5 | 62,5 | 21,7 | 9,8  | 16   | 3,28 | 3,16 | 5,3 | 8,53  | -0,12 | 2,14 | 3,23 | 12,9 |
| p930  | 39,2 | 35,4 | 37,4 | 47   | 20,4 | 2    | 9,6  | 3,23 | 3,3  | 5,2 | 8,32  | 0,07  | 1,9  | 3,12 | 7,4  |

|       |      |      |      |      |      |      |      |      |      |     |       |       |      |       |      |
|-------|------|------|------|------|------|------|------|------|------|-----|-------|-------|------|-------|------|
| p658  | 21,4 | 40,5 | 40,6 | 49,5 | 25,5 | 0,1  | 8,9  | 1,91 | 2,35 | 4,1 | 7,73  | 0,44  | 1,75 | 3,63  | 14,5 |
| p662  | 37,6 | 38,6 | 42,1 | 48   | 23,6 | 3,5  | 5,9  | 2,97 | 3,44 | 4,4 | 8,94  | 0,47  | 0,96 | 4,54  | 7,1  |
| p666  | 29,2 | 25,8 | 25,1 | 27   | 10,8 | -0,7 | 1,9  | 1,71 | 1,91 | 3   | 2,93  | 0,2   | 1,09 | -0,07 |      |
| p91   | 39,4 | 28   | 29,5 | 27   | 13   | 1,5  | -2,5 | 2,12 | 2,6  | 3,4 | 6,77  | 0,48  | 0,8  | 3,37  | 6,3  |
| p95   | 43,8 | 43,5 | 46,2 | 47,5 | 28,5 | 2,7  | 1,3  | 2,79 | 3,17 | 4,1 | 6,47  | 0,38  | 0,93 | 2,37  | 10,1 |
| p367  | 37,1 | 41,3 | 41   | 43   | 26,3 | -0,3 | 2    | 3,08 | 2,93 | 4,6 | 7,88  | -0,15 | 1,67 | 3,28  | 7,4  |
| p370  | 28,1 | 24,4 | 25,5 | 36,5 | 9,4  | 1,1  | 11   | 1,89 | 2,07 | 3,5 | 7,13  | 0,18  | 1,43 | 3,63  | 5,7  |
| p374  | 29,8 | 39,7 | 47   | 54   | 24,7 | 7,3  | 7    | 2,41 | 2,76 | 4,3 | 6,81  | 0,35  | 1,54 | 2,51  | 7,9  |
| p675  | 27,5 | 33,2 | 36,5 | 50   | 18,2 | 3,3  | 13,5 | 1,94 | 2,94 | 3,8 | 6,65  | 1     | 0,86 | 2,85  | 10,5 |
| p242  | 28,2 | 39,3 | 42,5 | 56   | 24,3 | 3,2  | 13,5 | 2,35 | 2,97 | 4,5 | 7,15  | 0,62  | 1,53 | 2,65  | 7,6  |
| p262  | 36,9 | 39,4 | 39   | 35   | 24,4 | -0,4 | -4   | 2,61 | 3,08 | 4,4 | 5,41  | 0,47  | 1,32 | 1,01  | 10,3 |
| p270  | 40,8 | 36,2 | 37,6 | 58,5 | 21,2 | 1,4  | 20,9 | 2,7  | 2,88 | 4,7 | 6,95  | 0,18  | 1,82 | 2,25  | 7,2  |
| p278  | 38,6 | 40,1 | 44,1 | 48,5 | 25,1 | 4    | 4,4  | 2,67 | 2,84 | 4,4 | 5,85  | 0,17  | 1,56 | 1,45  | 7,8  |
| p894  | 33,5 | 35,5 | 39,3 | 42   | 20,5 | 3,8  | 2,7  | 2,4  | 2,83 | 4,8 | 6,64  | 0,43  | 1,97 | 1,84  | 15,6 |
| p902  | 30   | 28,9 | 28,1 | 34   | 13,9 | -0,8 | 5,9  | 3,01 | 3,08 | 4,3 | 7,01  | 0,07  | 1,22 | 2,71  | 18,1 |
| p903  | 33,6 | 24,2 | 31,5 | 36   | 9,2  | 7,3  | 4,5  | 2,94 | 3    | 4,8 | 7,84  | 0,06  | 1,8  | 3,04  | 20,5 |
| p1006 | 33,1 | 39,8 | 44   | 43   | 24,8 | 4,2  | -1   | 3,48 | 3,33 | 4   | 7,26  | -0,15 | 0,67 | 3,26  | 7,8  |
| p994  | 31   | 31,6 | 53,8 | 34   | 16,6 | 22,2 |      | 2,47 | 2,64 | 4,1 | 7,72  | 0,17  | 1,46 | 3,62  | 16,1 |
| p1082 | 40,7 | 43,4 | 46,9 | 54   | 28,4 | 3,5  | 7,1  | 2,55 | 2,86 | 3,5 | 6,1   | 0,31  | 0,64 | 2,6   | 15,2 |
| p1090 | 49   | 39,4 | 43,1 | 49   | 24,4 | 3,7  | 5,9  | 3,83 | 4    | 6,4 | 10,37 | 0,17  | 2,4  | 3,97  | 9,6  |
| p203  | 35   | 35   | 34,7 | 46   | 20   | -0,3 | 11,3 | 2,13 | 2,62 | 3,9 | 7     | 0,49  | 1,28 | 3,1   | 15,9 |
| p208  | 32,1 | 45,4 | 46,6 | 47   | 30,4 | 1,2  | 0,4  | 2,11 | 2,72 | 4,7 | 6,94  | 0,61  | 1,98 | 2,24  | 12,7 |
| p211  | 35,5 | 33,9 | 39,6 | 40,5 | 18,9 | 5,7  | 0,9  | 2,48 | 3,65 | 4,4 | 7,81  | 1,17  | 0,75 | 3,41  | 10,3 |
| p1119 | 34,4 | 27,5 | 31   | 37   | 12,5 | 3,5  | 6    | 3,01 | 3,23 | 6,5 | 9,57  | 0,22  | 3,27 | 3,07  | 17,1 |
| p1123 | 22,1 | 24   | 35,9 | 61,5 | 9    | 11,9 | 25,6 | 2,66 | 2,7  | 4,8 | 6,81  | 0,04  | 2,1  | 2,01  |      |
| p730  | 32,6 | 27,6 | 26,8 | 41   | 12,6 | -0,8 | 14,2 | 2,68 | 3,05 | 4,7 | 7,67  | 0,37  | 1,65 | 2,97  | 19,7 |
| p735  | 31   | 28,5 | 54,9 | 38,5 | 13,5 | 26,4 |      | 2,45 | 3,01 | 4,1 | 6,32  | 0,56  | 1,09 | 2,22  | 13,6 |
| p702  | 53,3 | 60,8 | 60,5 | 64   | 45,8 | -0,3 | 3,5  | 3,29 | 4,33 | 4,8 | 7,77  | 1,04  | 0,47 | 2,97  | 6,9  |
| p710  | 45,1 | 43,7 | 57,4 | 48   | 28,7 | 13,7 |      | 3,06 | 3,58 | 4,6 | 7,38  | 0,52  | 1,02 | 2,78  | 8,9  |
| p715  | 51,8 | 52,5 | 56,4 | 77   | 37,5 | 3,9  | 20,6 | 3,63 | 4,64 | 5,6 | 9,36  | 1,01  | 0,96 | 3,76  | 7,2  |
| p486  | 38   | 41   | 46   | 66   | 26   | 5    | 20   | 2,86 | 3,42 | 4,6 | 8,29  | 0,56  | 1,18 | 3,69  | 9,8  |

|       |      |      |      |      |      |      |      |      |      |     |      |       |       |      |      |
|-------|------|------|------|------|------|------|------|------|------|-----|------|-------|-------|------|------|
| p494  | 31,6 | 42,9 | 44,8 | 62   | 27,9 | 1,9  | 17,2 | 2,53 | 3,18 | 5,6 | 8,54 | 0,65  | 2,42  | 2,94 | 7,7  |
| p503  | 25   | 25,5 | 29,8 | 43   | 10,5 | 4,3  | 13,2 | 2,62 | 2,94 | 5,7 | 8,63 | 0,32  | 2,76  | 2,93 | 15,4 |
| p331  | 36,1 | 31,8 | 40,9 | 44,5 | 16,8 | 9,1  | 3,6  | 3,01 | 3,55 | 4,7 | 6,38 | 0,54  | 1,15  | 1,68 | 14,1 |
| p223  | 40,8 | 57,2 | 63,8 | 65   | 42,2 | 6,6  | 1,2  | 3,07 | 3,97 | 3,9 | 6,42 | 0,9   | -0,07 | 2,52 | 8,2  |
| p522  | 21,8 | 21,8 | 34   | 49,5 | 6,8  | 12,2 | 15,5 | 1,67 | 2,27 | 5   | 7,72 | 0,6   | 2,73  | 2,72 | 8,3  |
| p570  | 47   | 48,4 | 52,6 | 58   | 33,4 | 4,2  | 5,4  | 3,58 | 4    | 5,3 | 9,18 | 0,42  | 1,3   | 3,88 | 16,1 |
| p575  | 40,3 | 44,8 | 50,5 | 64   | 29,8 | 5,7  | 13,5 | 2,83 | 3,01 | 5,1 | 8,65 | 0,18  | 2,09  | 3,55 | 12   |
| p103  | 46   | 48,9 | 50,2 | 63,5 | 33,9 | 1,3  | 13,3 | 3,15 | 4,17 | 5,5 | 7,74 | 1,02  | 1,33  | 2,24 | 7,2  |
| p98   | 37,2 | 34,5 | 37,1 | 50   | 19,5 | 2,6  | 12,9 | 3,41 | 4,06 | 5,4 | 8,24 | 0,65  | 1,34  | 2,84 | 7,1  |
| p851  | 28   | 24,4 | 30,5 | 33   | 9,4  | 6,1  | 2,5  | 3,28 | 3,21 | 3,8 | 7,13 | -0,07 | 0,59  | 3,33 | 12,1 |
| p861  | 44,2 | 22,8 | 24,4 | 49,5 | 7,8  | 1,6  | 25,1 | 3,24 | 3,34 | 4,9 | 9,36 | 0,1   | 1,56  | 4,46 |      |
| p747  | 39   | 22,6 | 32,6 | 55,5 | 7,6  | 10   | 22,9 | 2,89 | 2,94 | 5,4 | 8,96 | 0,05  | 2,46  | 3,56 |      |
| p438  | 58,5 | 53   | 53,2 | 65,5 | 38   | 0,2  | 12,3 | 3,46 | 3,83 | 4,7 | 9,69 | 0,37  | 0,87  | 4,99 | 9,7  |
| p440  | 63,2 | 58,4 | 58,5 | 71,5 | 43,4 | 0,1  | 13   | 3,94 | 4,51 | 6,3 | 8,95 | 0,57  | 1,79  | 2,65 | 5,6  |
| p878  | 42,3 | 43,7 | 48,1 | 55   | 28,7 | 4,4  | 6,9  | 3,46 | 3,55 | 5,7 | 8,79 | 0,09  | 2,15  | 3,09 | 15,1 |
| p882  | 41,9 | 31,4 | 37,4 | 53   | 16,4 | 6    | 15,6 | 2,97 | 2,81 | 3   | 6,65 | -0,16 | 0,19  | 3,65 | 10   |
| p342  | 44,5 | 46,4 | 46,7 | 50,5 | 31,4 | 0,3  | 3,8  | 2,82 | 3,89 | 4,8 | 7,7  | 1,07  | 0,91  | 2,9  | 7,4  |
| p351  | 35,2 | 36,2 | 47   | 53   | 21,2 | 10,8 | 6    | 2,72 | 3,01 | 5,6 | 8,03 | 0,29  | 2,59  | 2,43 | 8,7  |
| p151  | 33   | 41   | 41,4 | 48   | 26   | 0,4  | 6,6  | 2,24 | 4,05 | 4,3 | 6,73 | 1,81  | 0,25  | 2,43 | 8,3  |
| p462  | 42,6 | 46,5 | 46,2 | 51   | 31,5 | -0,3 | 4,8  | 2,96 | 3,7  | 5,5 | 8,37 | 0,74  | 1,8   | 2,87 | 6,8  |
| p783  | 44,2 | 32,2 | 37,6 | 45   | 17,2 | 5,4  | 7,4  | 2,41 | 2,47 | 3,4 | 6,37 | 0,06  | 0,93  | 2,97 | 12,6 |
| p791  | 39,5 | 38,1 | 38,2 | 29   | 23,1 | 0,1  |      | 2,55 | 2,85 | 4   | 6,6  | 0,3   | 1,15  | 2,6  | 8,9  |
| p1018 | 32,5 | 49   | 50,4 | 51,5 | 34   | 1,4  | 1,1  | 2,59 | 2,64 | 4,1 | 7,54 | 0,05  | 1,46  | 3,44 | 8,2  |
| p63   | 40,1 | 44,7 | 44,5 | 45   | 29,7 | -0,2 | 0,5  | 2,64 | 3,44 | 4,7 | 7,74 | 0,8   | 1,26  | 3,04 | 11,5 |
| p923  | 42,5 | 34,8 | 44,9 | 55   | 19,8 | 10,1 | 10,1 | 3,24 | 3,42 | 4,1 | 6,82 | 0,18  | 0,68  | 2,72 | 10,8 |
| p931  | 35,7 | 27,3 | 36   | 47,5 | 12,3 | 8,7  | 11,5 | 3,5  | 3,67 | 3,6 | 6,1  | 0,17  | -0,07 | 2,5  | 9,3  |
| p659  | 32   | 24,5 | 28,7 | 33   | 9,5  | 4,2  | 4,3  | 1,98 | 2,22 | 2,9 | 5,7  | 0,24  | 0,68  | 2,8  |      |
| p663  | 50,1 | 34,5 | 52,4 | 58,5 | 19,5 | 17,9 | 6,1  | 3,32 | 3,36 | 4,7 | 9,47 | 0,04  | 1,34  | 4,77 | 6,6  |
| p78   | 25,6 | 30,5 | 35,9 | 38   | 15,5 | 5,4  | 2,1  | 2,49 | 2,53 | 4,7 | 7,07 | 0,04  | 2,17  | 2,37 | 8,8  |
| p86   | 34   | 33,8 | 38,2 | 39   | 18,8 | 4,4  | 0,8  | 2,62 | 2,73 | 4,4 | 6,44 | 0,11  | 1,67  | 2,04 | 8,6  |
| p90   | 28   | 33,4 | 38,8 | 51   | 18,4 | 5,4  | 12,2 | 2,21 | 2,18 | 3,5 | 5,8  | -0,03 | 1,32  | 2,3  | 10,6 |



|       |      |      |      |      |      |      |      |      |      |     |       |       |       |      |      |
|-------|------|------|------|------|------|------|------|------|------|-----|-------|-------|-------|------|------|
| p375  | 28,2 | 30,3 | 32,2 | 47   | 15,3 | 1,9  | 14,8 | 2,15 | 2,29 | 2,5 | 6,08  | 0,14  | 0,21  | 3,58 | 10,8 |
| p243  | 28,4 | 24,8 | 30,8 | 40,5 | 9,8  | 6    | 9,7  | 2,47 | 2,51 | 4,2 | 6,2   | 0,04  | 1,69  | 2    |      |
| p274  | 36   | 40,5 | 43,8 | 47,5 | 25,5 | 3,3  | 3,7  | 2,39 | 2,67 | 4,9 | 8,3   | 0,28  | 2,23  | 3,4  | 8    |
| p282  | 26,7 | 24,4 | 24,9 | 27,5 | 9,4  | 0,5  | 2,6  | 2,17 | 2,18 | 2,8 | 4,8   | 0,01  | 0,62  | 2    | 12,6 |
| p906  | 28,2 | 35   | 47   | 53   | 20   | 12   | 6    | 2,67 | 2,51 | 5   | 8,92  | -0,16 | 2,49  | 3,92 | 13,2 |
| p986  | 32,8 | 40,5 | 42,5 | 52,5 | 25,5 | 2    | 10   | 3,05 | 3,53 | 6,6 | 8,24  | 0,48  | 3,07  | 1,64 | 14,9 |
| p798  | 26   | 27,5 | 32,6 | 35,5 | 12,5 | 5,1  | 2,9  | 2,38 | 2,61 | 5,5 | 7,88  | 0,23  | 2,89  | 2,38 | 14,2 |
| p803  | 29,2 | 23,8 | 29,4 | 48,5 | 8,8  | 5,6  | 19,1 | 2,76 | 2,8  | 5,5 | 8,46  | 0,04  | 2,7   | 2,96 | 20,7 |
| p807  | 39,8 | 38,3 | 43,8 | 55   | 23,3 | 5,5  | 11,2 | 3,95 | 4,19 | 7,8 | 12,04 | 0,24  | 3,61  | 4,24 | 9,9  |
| p810  | 38,2 | 41,6 | 52,6 | 57,5 | 26,6 | 11   | 4,9  | 2,42 | 3,17 | 5,2 | 8,07  | 0,75  | 2,03  | 2,87 | 14,3 |
| p826  | 28,7 | 24   | 26,2 | 30   | 9    | 2,2  | 3,8  | 2,96 | 3,1  | 4,9 | 7,58  | 0,14  | 1,8   | 2,68 |      |
| p830  | 35,1 | 30,3 | 39,2 | 42   | 15,3 | 8,9  | 2,8  | 2,99 | 3,15 | 5,1 | 8,1   | 0,16  | 1,95  | 3    | 12,9 |
| p838  | 28   | 19,3 | 28   | 32   | 4,3  | 8,7  | 4    | 2,5  | 2,5  | 3,7 | 7,2   | 0     | 1,2   | 3,5  | 18   |
| p839  | 31,5 | 28   | 29,6 | 37   | 13   | 1,6  | 7,4  | 3,02 | 3,05 | 6   | 8,8   | 0,03  | 2,95  | 2,8  | 10,1 |
| p206  | 39   | 41,9 | 46,6 | 51   | 26,9 | 4,7  | 4,4  | 2,82 | 3,58 | 5,8 | 9,41  | 0,76  | 2,22  | 3,61 | 10,9 |
| p939  | 36,6 | 40,8 | 44,2 | 48   | 25,8 | 3,4  | 3,8  | 2,43 | 3    | 5,3 | 7,63  | 0,57  | 2,3   | 2,33 | 20   |
| p941  | 32,7 | 30   | 31,7 | 33,5 | 15   | 1,7  | 1,8  | 2,75 | 2,63 | 4,4 | 6,53  | -0,12 | 1,77  | 2,13 | 13,7 |
| p971  | 35,2 | 26,7 | 23,6 | 40,5 | 11,7 | -3,1 | 16,9 | 3,37 | 3,42 | 4,7 | 7,44  | 0,05  | 1,28  | 2,74 |      |
| p975  | 47,5 | 36,7 | 39,1 | 48   | 21,7 | 2,4  | 8,9  | 2,81 | 2,95 | 5   | 6,95  | 0,14  | 2,05  | 1,95 | 16,3 |
| p979  | 32   | 31   | 43   | 47,5 | 16   | 12   | 4,5  | 2,34 | 2,55 | 2,3 | 5,8   | 0,21  | -0,25 | 3,5  | 17,8 |
| p27   | 32,1 | 37   | 40,1 | 49   | 22   | 3,1  | 8,9  | 2,52 | 3,96 | 6   | 9,14  | 1,44  | 2,04  | 3,14 | 9    |
| p30   | 27,5 | 25   | 29,9 | 32,5 | 10   | 4,9  | 2,6  | 2,04 | 2,37 | 4   | 6,84  | 0,33  | 1,63  | 2,84 |      |
| p38   | 34,1 | 22,7 | 27,6 | 30   | 7,7  | 4,9  | 2,4  | 2,93 | 3,36 | 5,4 | 8,88  | 0,43  | 2,04  | 3,48 |      |
| p1107 | 31,8 | 37,3 | 37,9 | 50,5 | 22,3 | 0,6  | 12,6 | 2,75 | 3,16 | 4,7 | 8,59  | 0,41  | 1,54  | 3,89 | 14,9 |
| p1127 | 32,1 | 31,6 | 33,5 | 34,5 | 16,6 | 1,9  | 1    | 3,23 | 3,38 | 6,3 | 8,76  | 0,15  | 2,92  | 2,46 | 13,3 |
| p722  | 44,5 | 51,6 | 62,4 | 65   | 36,6 | 10,8 | 2,6  | 3,51 | 4,12 | 6,3 | 9,2   | 0,61  | 2,18  | 2,9  | 10   |
| p727  | 41,2 | 32,4 | 58,1 | 63,5 | 17,4 | 25,7 | 5,4  | 3,3  | 3,95 | 7   | 9,2   | 0,65  | 3,05  | 2,2  | 11,2 |
| p707  | 54,5 | 49,8 | 51,2 | 58,5 | 34,8 | 1,4  | 7,3  | 4,23 | 4,96 | 7,7 | 9,66  | 0,73  | 2,74  | 1,96 | 10   |
| p499  | 44,7 | 50,7 | 52,9 | 65,5 | 35,7 | 2,2  | 12,6 | 3,34 | 3,77 | 6   | 9,03  | 0,43  | 2,23  | 3,03 | 13,7 |
| p315  | 32,6 | 15,6 | 56,2 | 59   | 0,6  | 40,6 | 2,8  | 2,42 | 4,68 | 5,6 | 8,32  | 2,26  | 0,92  | 2,72 | 14,4 |
| p318  | 29,4 | 42,4 | 45,4 | 64   | 27,4 | 3    | 18,6 | 2,07 | 3,83 | 6,2 | 9,87  | 1,76  | 2,37  | 3,67 | 9,9  |

|       |      |      |      |      |      |      |      |      |      |     |       |       |       |      |      |
|-------|------|------|------|------|------|------|------|------|------|-----|-------|-------|-------|------|------|
| p323  | 29,6 | 27   | 27,6 | 47   | 12   | 0,6  | 19,4 | 2,58 | 3,17 | 5,4 | 8,52  | 0,59  | 2,23  | 3,12 | 13,2 |
| p222  | 39,2 | 51,8 | 57,1 | 62   | 36,8 | 5,3  | 4,9  | 2,58 | 3,21 | 4,6 | 8,35  | 0,63  | 1,39  | 3,75 | 9    |
| p230  | 44,5 | 47,7 | 55,8 | 56   | 32,7 | 8,1  | 0,2  | 2,77 | 3,15 | 4,9 | 6,14  | 0,38  | 1,75  | 1,24 | 8,4  |
| p231  | 54,2 | 31   | 38,8 | 63,5 | 16   | 7,8  | 24,7 | 3,42 | 4,05 | 5,6 | 8,13  | 0,63  | 1,55  | 2,53 | 9    |
| p514  | 44,4 | 23,4 | 36,1 | 54   | 8,4  | 12,7 | 17,9 | 3,52 | 3,33 | 5,6 | 8,51  | -0,19 | 2,27  | 2,91 |      |
| p519  | 46,5 | 32,7 | 35,6 | 44   | 17,7 | 2,9  | 8,4  | 4,39 | 4,31 | 5,3 | 7,75  | -0,08 | 0,99  | 2,45 | 10,3 |
| p562  | 52,6 | 49,1 | 61,5 | 75   | 34,1 | 12,4 | 13,5 | 3,53 | 4,22 | 6,3 | 9,37  | 0,69  | 2,08  | 3,07 | 10,8 |
| p171  | 45,2 | 52,1 | 56,1 | 58   | 37,1 | 4    | 1,9  | 2,92 | 4,33 | 6,2 | 8,12  | 1,41  | 1,87  | 1,92 | 7,9  |
| p175  | 37,2 | 47,2 | 56   | 74   | 32,2 | 8,8  | 18   | 2,72 | 3,47 | 5,8 | 8,7   | 0,75  | 2,33  | 2,9  | 10,8 |
| p179  | 48,5 | 54   | 55,9 | 63,5 | 39   | 1,9  | 7,6  | 3,28 | 4,15 | 6,4 | 9,09  | 0,87  | 2,25  | 2,69 | 9,5  |
| p183  | 39,3 | 31,9 | 40,1 | 44   | 16,9 | 8,2  | 3,9  | 3,15 | 3,47 | 4,7 | 7,12  | 0,32  | 1,23  | 2,42 | 12,1 |
| p110  | 47   | 51,9 | 56,4 | 61   | 36,9 | 4,5  | 4,6  | 3,59 | 4,76 | 4,5 | 7,33  | 1,17  | -0,26 | 2,83 | 9    |
| p127  | 48   | 70   | 77,6 | 90   | 55   | 7,6  | 12,4 | 2,73 | 4,03 | 6,1 | 8,84  | 1,3   | 2,07  | 2,74 | 11,8 |
| p131  | 33,2 | 36,6 | 37,5 | 45   | 21,6 | 0,9  | 7,5  | 2,46 | 2,9  | 4,6 | 6,84  | 0,44  | 1,7   | 2,24 | 10,4 |
| p139  | 42,5 | 48,4 | 55,5 | 64,5 | 33,4 | 7,1  | 9    | 2,78 | 3,21 | 5,4 | 9,59  | 0,43  | 2,19  | 4,19 | 9,5  |
| p842  | 25   | 21,9 | 23,1 | 39,5 | 6,9  | 1,2  | 16,4 | 2,42 | 2,56 | 4,6 | 7,89  | 0,14  | 2,04  | 3,29 | 11,9 |
| p847  | 24   | 22,4 | 25,5 | 46   | 7,4  | 3,1  | 20,5 | 2,06 | 2,11 | 3,7 | 6,5   | 0,05  | 1,59  | 2,8  |      |
| p754  | 40,2 | 34,3 | 37,6 | 43,5 | 19,3 | 3,3  | 5,9  | 3,1  | 3    | 5,1 | 8,25  | -0,1  | 2,1   | 3,15 | 17,3 |
| p433  | 43,8 | 44,6 | 51,5 | 58   | 29,6 | 6,9  | 6,5  | 3,21 | 3,81 | 6,2 | 9,45  | 0,6   | 2,39  | 3,25 | 9,7  |
| p435  | 52,6 | 64,4 | 70,1 | 81,5 | 49,4 | 5,7  | 11,4 | 3,84 | 4,92 | 5,9 | 10,19 | 1,08  | 0,98  | 4,29 | 10,2 |
| p871  | 29,3 | 22,5 | 44   | 58,5 | 7,5  | 21,5 | 14,5 | 2,6  | 2,67 | 4,7 | 8,89  | 0,07  | 2,03  | 4,19 |      |
| p875  | 42   | 25,7 | 52,9 | 40,5 | 10,7 | 27,2 |      | 2,92 | 3,06 | 3,4 | 7,04  | 0,14  | 0,34  | 3,64 |      |
| p350  | 61,5 | 47,6 | 59,9 | 60   | 32,6 | 12,3 | 0,1  | 3,23 | 3,83 | 6,6 | 8,45  | 0,6   | 2,77  | 1,85 | 8    |
| p359  | 42,6 | 65,7 | 68,8 | 73   | 50,7 | 3,1  | 4,2  | 3,11 | 4,5  | 7,1 | 12,27 | 1,39  | 2,6   | 5,17 | 12,5 |
| p155  | 34,5 | 36   | 39,2 | 48   | 21   | 3,2  | 8,8  | 2,1  | 2,9  | 3,2 | 6,67  | 0,8   | 0,3   | 3,47 | 9,8  |
| p162  | 50,2 | 46   | 48,9 | 56,5 | 31   | 2,9  | 7,6  | 2,74 | 4,19 | 5,6 | 10    | 1,45  | 1,41  | 4,4  | 8,2  |
| p1038 | 38,5 | 25   | 30   | 42,5 | 10   | 5    | 12,5 | 3,06 | 3,07 | 3,7 | 6,23  | 0,01  | 0,63  | 2,53 |      |
| p1042 | 46,7 | 44   | 47,1 | 52   | 29   | 3,1  | 4,9  | 3,25 | 3,28 | 4,6 | 8,45  | 0,03  | 1,32  | 3,85 | 9,7  |
| p1046 | 38   | 21   | 26,5 | 33   | 6    | 5,5  | 6,5  | 2,53 | 2,53 | 3,4 | 4,96  | 0     | 0,87  | 1,56 |      |
| p1050 | 34,5 | 25   | 26,9 | 29   | 10   | 1,9  | 2,1  | 1,93 | 2,06 | 2,9 | 4,8   | 0,13  | 0,84  | 1,9  |      |
| p466  | 40   | 32,6 | 36,1 | 41   | 17,6 | 3,5  | 4,9  | 2,25 | 2,58 | 3,9 | 5,59  | 0,33  | 1,32  | 1,69 | 9,7  |

[illegible]

[illegible]
